# Supplementary material for: Can rapid approaches to qualitative analysis deliver timely, valid findings to clinical leaders? A mixed methods study comparing rapid and thematic analysis
Source: PubMed Central journal article supplement (PMC6194404; doi:10.1136/bmjopen-2017-019993), 2018-10-08
Supplement: bmjopen-2017-019993.draft_revisions.pdf [file bmjopen-2017-019993.draft_revisions.pdf]

# BMJ Open

BMJ Open is committed to open peer review. As part of this commitment we make the peer review history of every article we publish publicly available.

When an article is published we post the peer reviewers' comments and the authors' responses online. We also post the versions of the paper that were used during peer review. These are the versions that the peer review comments apply to.

The versions of the paper that follow are the versions that were submitted during the peer review process. They are not the versions of record or the final published versions. They should not be cited or distributed as the published version of this manuscript.

BMJ Open is an open access journal and the full, final, typeset and author-corrected version of record of the manuscript is available on our site with no access controls, subscription charges or pay-per-view fees (<http://bmjopen.bmj.com>).

If you have any questions on BMJ Open's open peer review process please email [editorial.bmjopen@bmj.com](mailto:editorial.bmjopen@bmj.com)

# BMJ Open

## Can rapid approaches to qualitative analysis deliver timely, valid findings to clinical leaders? A mixed methods study comparing rapid and thematic analysis

|                               |                                                                                                                                                                                                                                                                                                                                                                                                                                                                                                        |
|-------------------------------|--------------------------------------------------------------------------------------------------------------------------------------------------------------------------------------------------------------------------------------------------------------------------------------------------------------------------------------------------------------------------------------------------------------------------------------------------------------------------------------------------------|
| Journal:                      | <i>BMJ Open</i>                                                                                                                                                                                                                                                                                                                                                                                                                                                                                        |
| Manuscript ID                 | bmjopen-2017-019993                                                                                                                                                                                                                                                                                                                                                                                                                                                                                    |
| Article Type:                 | Research                                                                                                                                                                                                                                                                                                                                                                                                                                                                                               |
| Date Submitted by the Author: | 06-Oct-2017                                                                                                                                                                                                                                                                                                                                                                                                                                                                                            |
| Complete List of Authors:     | Taylor, Beck; University of Birmingham, Institute of Applied Health Research<br>Henshall, Catherine; University of Birmingham, Institute of Applied Health Research; Oxford Brookes University, OxINMAHR, Faculty of Health and Life Sciences<br>Litchfield, Ian; University of Birmingham, Institute of Applied Health Research<br>Greenfield, Sheila; University of Birmingham, Institute of Applied Health Research<br>Kenyon, Sara; University of Birmingham, Institute of Applied Health Research |
| Keywords:                     | QUALITATIVE RESEARCH, HEALTH SERVICES ADMINISTRATION & MANAGEMENT, Maternal medicine < OBSTETRICS                                                                                                                                                                                                                                                                                                                                                                                                      |
|                               |                                                                                                                                                                                                                                                                                                                                                                                                                                                                                                        |

SCHOLARONE™  
Manuscripts

Only

1  
2  
3 1 **Can rapid approaches to qualitative analysis deliver timely, valid findings to clinical leaders? A**  
4 2 **mixed methods study comparing rapid and thematic analysis**  
5 3  
6 4  
7 5  
8 6

9 7 **Beck Taylor<sup>a</sup>**

10 8 [r.taylor.3@bham.ac.uk](mailto:r.taylor.3@bham.ac.uk)

11 9 Telephone: +44 (0)121 414 2848  
12 10

13 11 **Catherine Henshall<sup>a,i</sup>**

14 12 [chenshall@brookes.ac.uk](mailto:chenshall@brookes.ac.uk)

15 13 Telephone: +44 (0)7768 918298  
16 14

17 15 **Ian Litchfield<sup>a,\*</sup>**

18 16 [i.litchfield@bham.ac.uk](mailto:i.litchfield@bham.ac.uk)

19 17 Telephone: +44 (0)121 414 6006  
20 18

21 19 **Sheila Greenfield<sup>a</sup>**

22 20 [s.m.greenfield@bham.ac.uk](mailto:s.m.greenfield@bham.ac.uk)

23 21 Telephone: +44 (0)121 414 6493  
24 22

25 23 **Sara Kenyon<sup>a</sup>**

26 24 [s.kenyon@bham.ac.uk](mailto:s.kenyon@bham.ac.uk)

27 25 Telephone: +44 (0)121 414 9063  
28 26  
29 27

30 28 <sup>a</sup>**Affiliate address for all authors and current address for all except C Henshall:** Institute of Applied  
31 29 Health Research, College of Medical and Dental Sciences, University of Birmingham, Edgbaston,  
32 30 Birmingham, B15 2TT, United Kingdom  
33 31

34 32 <sup>i</sup>**Present address:** OxINMAHR, Oxford Brookes University, Faculty of Health and Life Sciences, The  
35 33 Colonnade, Gipsy Lane, Headington, Oxford, OX3 0BP, United Kingdom  
36 34

37 35 **\*Corresponding author**  
38 36  
39 37  
40 38  
41 39  
42 40  
43 41  
44 42  
45 43  
46 44  
47 45  
48 46  
49 47  
50 48  
51 49  
52 50  
53 51  
54 52  
55 53  
56 54  
57 55  
58 56  
59 57  
60 58

1  
2  
3 51 **ABSTRACT**  
4

5 52 **Objectives:** This study compares rapid and traditional analyses of a UK health service evaluation  
6  
7 53 dataset, to explore differences in researcher time, and consistency of outputs.  
8

9 54 **Design:** Mixed methods study, quantitatively and qualitatively comparing qualitative methods  
10

11 55 **Setting:** Data from a home birth service evaluation study in a hospital in the English National Health  
12  
13 56 Service which took place between October-December 2014. Two research teams independently  
14  
15 57 analysed the data: one team used a Thematic Analysis approach using the Framework Method, and  
16  
17 58 the second used Rapid Analysis.  
18

19 59 **Participants:** Home birth midwives (6), midwifery support workers (4), commissioners (4), managers  
20  
21 60 (6), and community midwives (12) and a patient representative (1) participated in the original study.  
22  
23

24 61 **Interventions:** None  
25

26 62 **Primary outcome measures:** Time taken to complete analysis in person hours; analysis findings and  
27  
28 63 recommendations matched, partially matched, or not matched across the two teams.  
29

30 64 **Results:** Rapid Analysis data management took less time than Thematic Analysis (43 v 116.5 hours).  
31  
32 65 Rapid Analysis took 100 hours, and Thematic Analysis 126.5 hours in total, with interpretation and  
33  
34 66 write up taking much longer in the Rapid Analysis (52 v 8 hours). Rapid Analysis findings overlapped  
35  
36 67 with 79% of Thematic Analysis findings, and Thematic Analysis overlapped with 63% of the Rapid  
37  
38 68 Analysis findings. Rapid Analysis recommendations overlapped with 55% of those from the Thematic  
39  
40 69 Analysis, and Thematic Analysis overlapped with 59% of the Rapid Analysis recommendations.  
41

42 70 **Conclusions:** Rapid Analysis delivered a modest time saving. Excessive time to interpret data in Rapid  
43  
44 71 Analysis in this study may be due to differences between research teams. There was overlap in  
45  
46 72 outputs between approaches, more in findings than recommendations. Rapid Analysis may have the  
47  
48 73 potential to deliver valid, timely findings while taking less time. We recommend further comparisons  
49  
50 74 using additional data sets with more similar research teams.  
51  
52

53 75  
54

55 76 **Keywords**  
56  
57  
58  
59  
60

1  
2  
3 77 Qualitative Research

4  
5 78 Health Services Administration & Management

6  
7 79 Maternal Medicine

8  
9 80

10  
11 81 **Strengths and limitations of this study**

- 12  
13 82 • Our study explores a strategy to address the time-lag in reporting qualitative findings to  
14  
15 83 clinicians and policymakers, which slows translation of research into practice.  
16  
17 84 • This is the first comparison of qualitative analytical methods in applied health research  
18  
19 85 which compares both researcher time *and* outputs, with a complete study dataset.  
20  
21 86 • The work describes the process of comparing time and analytical outputs in detail, to inform  
22  
23 87 others planning further methodological comparisons.  
24  
25 88 • Due to the time lag in thematic analysis outputs, our study did not triangulate findings with  
26  
27 89 the original participants.  
28  
29 90 • The study uncovered important challenges in comparing analytical approaches between  
30  
31 91 research teams which can inform the design future work in this area.  
32  
33  
34  
35  
36  
37  
38  
39  
40  
41  
42  
43  
44  
45  
46  
47  
48  
49  
50  
51  
52  
53  
54  
55  
56  
57  
58  
59  
60

## 92 BACKGROUND

93 Applied health research frequently adopts mixed methods, often using qualitative approaches.[1]

94 Applications of qualitative methods include: early work to identify areas for focus; throughout a

95 study to provide continued user experience; following a trial or intervention implementation to

96 explain outcomes and/or identify stakeholder experiences.[2] Increasingly this type of research can

97 include a broader range of contributors, for example where members of the public, patients,

98 clinicians, and researchers are involved in analysing and interpreting data to ensure a multi-

99 disciplinary perspective, or pragmatically using several researchers to code data in the interests of

100 time.[3, 4]

101

102 Typically stakeholders want rapid results,[5] yet traditional qualitative approaches often

103 considerable time is required to manage and interpret data, and deliver findings.[6, 7] In a service

104 context, delays may render the findings out of date, reducing their applicability and relevance. There

105 are examples of apparently more rapid alternatives to traditional qualitative approaches.[7-11]

106 There are three broad areas where time can be saved; by reducing data collection time, for example

107 by relying on untranscribed audio recordings, notes, summaries and mind maps;[8-10] by minimising

108 the time spent managing data by summarising as opposed to formally coding;[9, 11] by limiting the

109 time spent on analysis by using a 'one sheet of paper' summary to explore a sample of a large pre-

110 coded dataset.[7] What remains unknown is whether rapid methods of analysis deliver equivalent

111 findings to traditional approaches, or how much time they save in practice.

112

113 There are a limited number of studies that have compared different qualitative analytical

114 techniques.[9, 12-14] In some of the empirical examples identified, methodologists have

115 predominantly compared methods of data collection (e.g. interviews versus internet forums[12]),

116 and focused on content analysis rather than interpretation. Of the three examples identified that

117 compare analytical approaches one used focus group data to compare thematic analysis of a partial

1  
2  
3 118 dataset with mind-mapping of a full dataset.[9] While this paper provides minimal detail regarding  
4  
5 119 the method of comparison, it reported differences in time taken to analyse the data, and in the  
6  
7 120 number and presentation of codes. The second example compared software-assisted and constant  
8  
9 121 comparative approaches to analysis describing differences in the frequency of codes and coding  
10  
11 122 levels.[13] The third example compared analysis of focus group data directly from audio recordings,  
12  
13 123 with thematic analysis of transcribed data, and found that themes generated were comparable.[14]

14  
15 124

16  
17 125 The work we present here was conducted as part of the Collaboration for Leadership in Applied  
18  
19 126 Health Research and Care (CLAHRC) programme in the West Midlands of England. CLAHRC involves  
20  
21 127 local teams across Universities and National Health Service organisations working in partnership to  
22  
23 128 deliver research to improve services for patient benefit.[15] As part of a service evaluation study of a  
24  
25 129 new home birth service, we gathered interview, focus group and documentary data. We then  
26  
27 130 compared the speed and outputs of rapid and traditional techniques applied to the same dataset.  
28  
29 131 For the Rapid Analysis (RA) we used the approach developed by Hamilton at UCLA.[11] We  
30  
31 132 compared this with Thematic Analysis (TA)[16] and the Framework Method which was selected due  
32  
33 133 to the team's existing familiarity with this approach, and the fact that it is increasingly applied in  
34  
35 134 multidisciplinary health services research.[6, 17]

36  
37 135

## 38 39 40 136 **METHOD**

41  
42 137 This study compares rapid and traditional analyses of a UK health service evaluation dataset, to  
43  
44 138 explore differences in researcher time, and consistency of outputs. This was a mixed methods study,  
45  
46 139 quantitatively and qualitatively comparing the outputs of qualitative methods.

47  
48  
49 140

## 50 51 141 **SETTING**

52  
53 142 The data came from a home birth service evaluation study in a hospital in the English National  
54  
55 143 Health Service which took place between October-December 2014.

1  
2  
3 1444  
5 145 **Characteristics of participants**6  
7 146 Home birth midwives (6), midwifery support workers (4), commissioners (4), managers (6), and  
8  
9 147 community midwives (12) and a patient representative (1) participated in the original study.10  
11 14812  
13 149 **Description of processes, interventions and comparisons**14  
15 150 In the original evaluation, an evaluability assessment approach was adopted,[18] and its specific  
16  
17 151 objectives were to: establish the original programme design and how the service differed from this  
18  
19 152 design and why; identify facilitators or barriers to implementation; establish what service data are  
20  
21 153 available, and how it is being /could be gathered; identify how staff would develop/improve the  
22  
23 154 service.24  
25  
26 15527  
28 156 Twenty three provider and commissioning staff and one patient representative were purposively  
29  
30 157 sampled, with recruitment by direct email or telephone invite, with three unable to take part due to  
31  
32 158 availability. Semi-structured interviews informed by the study objectives were conducted by  
33  
34 159 [researcher 1] at participants' workplaces. A focus group of 12 staff was facilitated by [researcher 1]  
35  
36 160 and [researcher 2], also structured according to the study objectives. A convenience sampling  
37  
38 161 approach was taken for the focus group, with midwives available at the allotted time invited to take  
39  
40 162 part at their workplace. Participants were not known to researchers prior to the study. Focus groups  
41  
42 163 lasted approximately one hour, were digitally recorded and transcribed for analysis, with minimal  
43  
44 164 field notes taken. Participants did not review transcripts. Eight key service documents were also  
45  
46 165 utilised in the analysis (business case, service guidelines, commissioning policy). The primary service  
47  
48 166 review and secondary analysis were reviewed by the University of Birmingham Ethics Committee, ref  
49  
50 167 ERN\_15-0127S. Local approval was obtained from the hospital Research and Development Team.  
51  
52 168 The data was analysed independently using firstly RA and secondly TA as described in detail below.  
53  
54 169 All researchers work in applied health research in the same department of a UK University.  
55  
56  
57  
58  
59  
60



1  
2  
3 170 Researcher 1 is a public health physician, Researcher 2 is a registered nurse, Researcher 3 is a  
4  
5 171 registered midwife. Researchers 4 and 5 are health service researchers, Researcher 6 is a medical  
6  
7 172 sociologist. A summary and comparison of the process used for the two analyses is shown in Table 1.  
8

9 173

10  
11 174 The primary Rapid Analysis (RA) (*[researcher 1], [researcher 2], [researcher 3]*)

12  
13 175 RA was conducted between November and December 2014. The rapid qualitative analysis approach  
14  
15 176 used[11] was designed to deliver timely findings with methodological rigour. The approach includes  
16  
17 177 guidance on data collection and report writing and was developed using teams of less experienced  
18  
19 178 researchers. Here we have used only the analytical methodology and researchers experienced in  
20  
21 179 qualitative methods. Hamilton relates how the reduced timeframe of rapid methods means that  
22  
23 180 they tend to be more deductive and explanatory than inductive and exploratory.[11] However, the  
24  
25 181 work presented here utilised both inductive and deductive approaches. The process is presented in  
26  
27 182 detail in Table 1. Researchers spent approximately one hour with each transcript or document,  
28  
29 183 noting key issues in a one-sheet, structured 'summary template' (Supplementary File 1). Summarised  
30  
31 184 data was explored with respect to the research objectives, to produce a report summarising findings  
32  
33 185 and recommendations.  
34

35  
36 186

37  
38 187 Secondary Thematic Analysis using the Framework Method (TA) (*[researcher 4], [researcher 5],*  
39  
40 188 *[researcher 6]*)

41  
42  
43 189 The secondary analysis was conducted by [researcher 4] between June and September 2015, after  
44  
45 190 the original RA was complete, with oversight and support from [researchers 5 and 6]; all three are  
46  
47 191 experienced qualitative applied health researchers from outside of the original team. Typically, the  
48  
49 192 purpose of secondary analysis is to explore new research questions,[19]but in this case secondary  
50  
51 193 analysis was performed using a different method to meet the same objectives as the primary  
52  
53 194 analysis, to compare the outputs of the two methods. The original team (*[researchers 1, 2 and 3]*)  
54  
55 195 provided brief contextual details about the field, the organisations and participants involved, and the  
56  
57  
58  
59  
60

196 background to the project. No further discussion occurred, to avoid revealing RA findings to the TA  
 197 team. The TA was informed by the original research objectives, using an inductive approach, and  
 198 following the steps set out in the Framework Method:[6, 17] familiarisation, coding, developing a  
 199 framework, applying the framework, charting data into the framework, interpreting data, and  
 200 writing up. Table 1 summarises the process.

201

202 **Table 1: Description of the Rapid Analysis and Thematic Analysis**

|                 | Rapid Analysis                                                                                                                                                                                                                                                                                                                                                                                                                               | Thematic Analysis                                                                                                                                                                                                                                                                                                          |
|-----------------|----------------------------------------------------------------------------------------------------------------------------------------------------------------------------------------------------------------------------------------------------------------------------------------------------------------------------------------------------------------------------------------------------------------------------------------------|----------------------------------------------------------------------------------------------------------------------------------------------------------------------------------------------------------------------------------------------------------------------------------------------------------------------------|
| The researchers | Clinical background<br>Embedded in the field<br>First time using RA<br>Shared office, opportunity to interact<br>Evenly shared workload<br>Main focus of work<br>Conducted over short period<br>Focused on producing and 'crafting' outputs for known stakeholders                                                                                                                                                                           | Not clinical<br>No prior exposure to field<br>Experienced in TA – no need to 'learn'<br>No informal interaction/reflection<br>[Researcher 4] conducted most of the analysis<br>Conducted alongside other core work<br>Project delivered over a longer period<br>Less focused on the needs and expectations of stakeholders |
| Data collection | Interviews, focus groups conducted, documents gathered from participants by [researcher 1], [researcher 2] facilitating focus group.                                                                                                                                                                                                                                                                                                         | Provided with pre-gathered dataset.                                                                                                                                                                                                                                                                                        |
| Transcription   | Audio recordings transcribed by third party.<br>Transcripts checked for accuracy by researcher.<br>Participant name retained in transcript                                                                                                                                                                                                                                                                                                   | Pseudoanonymised transcripts and documents provided.                                                                                                                                                                                                                                                                       |
| Timing          | During and following data collection process.                                                                                                                                                                                                                                                                                                                                                                                                | Analysis conducted post-data collection.                                                                                                                                                                                                                                                                                   |
| Ordering        | Interviews, then focus groups, then documents. Strategic participant data analysed first.                                                                                                                                                                                                                                                                                                                                                    | Documents, then interviews with strategic participants first, finally the focus groups                                                                                                                                                                                                                                     |
| Early analysis  | [researchers 1 and 2] dual analysed one interview transcript, inserting them into a 'summary template', organised according to the research objectives (see Supplementary File 1). They compared template content. The process and the template structure were reviewed and amended (some subheadings applied). A second transcript was subsequently dual analysed in the same way. The 'one hour per transcript' rule was not applied here, | A sample of transcripts reflecting a range of job title and seniority were analysed independently by [researchers 4 and 5] and the themes that emerged discussed and finalised. These themes were arranged into analytical hierarchies and formed the basis for the codification of the remaining data.                    |

|                        |                                                                                                                                                                                                                                                                                                                                                                                                                                                                                                                                                  |                                                                                                                                                                                                                                                                                                                                               |
|------------------------|--------------------------------------------------------------------------------------------------------------------------------------------------------------------------------------------------------------------------------------------------------------------------------------------------------------------------------------------------------------------------------------------------------------------------------------------------------------------------------------------------------------------------------------------------|-----------------------------------------------------------------------------------------------------------------------------------------------------------------------------------------------------------------------------------------------------------------------------------------------------------------------------------------------|
|                        | spending 1.5-2 hours on each.                                                                                                                                                                                                                                                                                                                                                                                                                                                                                                                    |                                                                                                                                                                                                                                                                                                                                               |
| Main analysis          | Remaining data items allocated equally to [researchers 1 and 2], following the same process, limiting time to one hour maximum per data item (less for some less complex documents). Researcher entered information directly into a matrix, structured as the template, using individual templates duplicated work.                                                                                                                                                                                                                              | [Researchers 4 and 5] independently analysed the same three transcripts and the resulting themes and sub-themes were agreed and formed the analytical hierarchy for the remaining data.                                                                                                                                                       |
| Researcher interaction | [Researchers 1, 2 and 3] reflected and discussed the data and interpretation on a regular, iterative basis                                                                                                                                                                                                                                                                                                                                                                                                                                       | [Researchers 4 and 5] had several telephone and one face to face discussion.                                                                                                                                                                                                                                                                  |
| Interpretation         | [Researchers 1 and 2] reviewed content in one another's matrices, and combined them. Data were allocated equally to [researchers 1 and 2] for interpretation and write up, organised according to the template, e.g. facilitators to implementation. The 'barriers' section was more complex, and this was subdivided it into themes which were allocated to [researchers 1 or 2], e.g. training, promotion and recruitment. A summary of findings and a set of recommendations were produced for each. Summaries were reorganised thematically. | [Researcher 1] undertook interpretation and write-up of the findings according to the thematic headings.<br><br>For each theme and sub-theme an explanatory sentence was produced and an exemplar quote or quotes was selected.<br><br>These themes and sub-themes were used to create a list of findings specific to each overarching theme. |
| Final report writing   | Summaries of findings and recommendations were combined and checked by [Researchers 1, 2 and 3] to eliminate duplication and reach consensus regarding interpretation, revisiting the primary data where necessary.                                                                                                                                                                                                                                                                                                                              | These findings were used to inform a final report, populating the template provided by [researcher 1]. The report included a logic model and focused on a series of recommendations for the mitigation of existing issues where the service was failing.                                                                                      |

203

204 The comparison

205 The comparative analysis was conducted between October 2015 and May 2016, comparing three

206 aspects of the analyses: time taken, findings, and recommendations. Each team recorded the time

207 taken to perform every activity. Summary statistics were produced using data from the resulting

208 timesheets. Findings we defined as individual issues identified and included in a report.

209 Recommendations were defined as suggested actions to improve or maintain the service. Each team

210 then independently compared RA and TA findings, allocating a 'match', 'partial match' or 'mismatch'

211 category. Both teams then met to discuss and reach consensus. Any mismatches were discussed,  
212 and perceived reasons agreed and recorded and summary statistics produced.

213

## 214 RESULTS

215

### 216 The research teams

217 Table 2 presents the characteristics of the two research teams.

218

219 **Table 2: Characteristics of the two research teams**

| Rapid Analysis Researchers                                    | Thematic Analysis Researchers                           |
|---------------------------------------------------------------|---------------------------------------------------------|
| Clinical                                                      | Lead researcher not clinical                            |
| Embedded in field                                             | No prior exposure to the field                          |
| BT collected the data                                         | Did not collect data                                    |
| Using Rapid Analysis for first time – developing new practice | Experienced in Thematic Analysis, using existing skills |
| Shared office                                                 | No shared space                                         |
| Equal workload within team                                    | IL conducted majority of analysis                       |
| Analysis main task at work                                    | Analysis conducted alongside other commitments          |
| Focused on producing outputs for known stakeholders           | Much less focused on the stakeholder team               |

220

### 221 Comparison of time

222 Table 3 illustrates the time taken at each stage of the process. The four hours of background  
223 discussions to provide IL with context were not counted in the total.

224

225 The RA data review and management took around a third of the time of the TA (43 hours and 116.5  
226 respectively). The reverse was true of the report writing, RA was more than six times longer at 52  
227 hours.

228

### 229 Comparison of findings

1  
2  
3 230 The comparison of findings is presented in Table 4. TA elicited marginally more findings than RA (153  
4  
5 231 v 131). There were 107 matches (example provided below). There are differences in reporting style  
6  
7 232 and level of detail in the findings (explored further in the discussion).  
8

9 233

10  
11 234 *“There are issues around communication with ambulances/paramedics.” TA finding*  
12

13 235

14  
15 236 *“Some paramedics are unaware that the HBS exists and there have been delays of up to 30 minutes*  
16  
17 237 *between the paramedics being informed of a BBA and this being cascaded down to midwives.” RA*

18  
19 238

*finding*

20  
21 239

22  
23  
24 240 Findings from one method frequently matched two or more from the other: 71 RA and 78 TA  
25  
26 241 findings delivered 107 matches. There were 43 partial matches, where findings identified similar, but  
27  
28 242 not identical issues (28 RA, 37 TA, some matching more than once), for example:  
29

30 243

31  
32 244 *“There was a general consensus that useful meetings with a range of stakeholders were hard to*  
33  
34 245 *arrange for a number of reasons including workload and shift pattern.” TA finding*  
35

36 246

37  
38 247 *“While support is strong in-principle, there is no formal process for strategic-level consultation and*  
39  
40 248 *decision-making about the HBT within the provider Trust (outside of the Project Board). In addition,*  
41  
42 249 *busy workloads make collaborative working challenging.” RA finding*  
43

44  
45 250

46  
47 251 Eighty findings could not be matched: 46 or 37% of all RA findings, and 34 (21%) of the TA findings.  
48  
49 252 Exploration (see Table 5) revealed that the most common reason for mismatches was that the other  
50  
51 253 team simply did not identify it in the data (confirmed by returning to the original data). The TA team  
52  
53 254 did not find 11%, and the RA team did not find 12% of the opposite team’s findings. The next most  
54  
55  
56  
57  
58  
59

255 common reason was that findings were specific or detailed, rather than key issues with broad  
 256 relevance. The RA team also reported positive findings which the TA team did not deem useful.

257

258 There were a small number of findings which emerged from interpretation of 'what was not in the  
 259 data'. For example, the RA team reported that staff may not gain necessary qualifications for  
 260 deployment, which was a risk to service resilience, connecting data on staff training with other data  
 261 concerning service staffing requirements, rather than a direct report from research participants. The  
 262 TA team did not identify this finding.. The RA team's contextual knowledge meant that they  
 263 perceived some TA findings to be incorrect. For example, a TA finding suggesting that regular  
 264 meetings were helpful was rejected, as the RA team had been informed (outside of the formal data  
 265 collection) that the meetings were not functioning as intended.

266

267 Finally, the RA team unconsciously suppressed two findings that were politically challenging. For  
 268 example, confusion regarding role boundaries among participants was a TA finding that RA  
 269 researchers reflected they had suppressed.

270

271 Some findings appeared to have no match, but cross checking revealed that the finding aligned with  
 272 the other team's recommendations (9 RA and 3 TA findings). For example, the RA found that staff  
 273 had requested more emergency training, and the TA recommendations included provision of more  
 274 emergency training.

275

276 **Table 3: Time taken to complete analysis using rapid analysis and thematic analysis**

|                                           | Rapid analysis team                               |      |       | Thematic analysis team |                                 |       |    |      |
|-------------------------------------------|---------------------------------------------------|------|-------|------------------------|---------------------------------|-------|----|------|
|                                           | [R1]                                              | [R2] | Total | [R4]                   | [R5]                            | Total |    |      |
| <b>Primary data review and management</b> | Review 2 transcripts and develop summary template | 6    | 5     | 11                     | Review/code initial transcripts | 11    | 10 | 20.5 |
|                                           | Refine template                                   | 2    | 2     | 4                      | Developing framework            | 3     | 1  | 4    |

|                                          |                                                     |    |     |    |                                   |     |          |
|------------------------------------------|-----------------------------------------------------|----|-----|----|-----------------------------------|-----|----------|
|                                          | Complete summary template for remaining transcripts | 13 | 11  | 24 | Review/code remaining transcripts | 82  | 82       |
|                                          | Reviewing documents                                 | 2  | 2   | 4  | Reviewing documents               | 4   | 4        |
|                                          | Reviewing matrix                                    | 2  | 3   | 5  | Final themes                      | 8   | 8        |
|                                          | <b>Total</b>                                        | 25 | 23  | 48 | <b>Total</b>                      | 108 | 11 118.5 |
| <b>Interpretation and report writing</b> | Writing up findings                                 | 16 | 16  | 32 | Writing up findings               | 4   | 4        |
|                                          | Writing recommendations                             | 8  | 12  | 20 | Writing recommendations           | 4   | 4        |
|                                          | <b>Total</b>                                        | 24 | 28  | 52 | <b>Total</b>                      | 8   | 0 8      |
| <b>TOTAL</b>                             |                                                     |    | 100 |    |                                   |     | 126.5    |

277

278

279 **Table 4: Quantitative comparison of findings and recommendations elicited using rapid analysis**280 **and thematic analysis**

|                        |                                                               | <b>Rapid analysis</b> |     | <b>Thematic analysis</b> |     | <b>Total</b> |
|------------------------|---------------------------------------------------------------|-----------------------|-----|--------------------------|-----|--------------|
| <b>Findings</b>        | <b>Matched</b>                                                | 71                    | 54% | 78                       | 51% | 107          |
|                        | <b>Partially matched</b>                                      | 28                    | 21% | 37                       | 24% | 43           |
|                        | <b>No match found</b>                                         | 48                    | 37% | 32                       | 21% | 80           |
|                        | <b>Appears in other team's recommendations (not findings)</b> | 9                     | 7%  | 3                        | 2%  | 12           |
|                        | <b>Total*</b>                                                 | 131                   |     | 153                      |     | N/A          |
| <b>Recommendations</b> | <b>Match</b>                                                  | 18                    | 28% | 32                       | 34% | 32           |
|                        | <b>Partial match</b>                                          | 20                    | 31% | 26                       | 28% | 26           |
|                        | <b>No match</b>                                               | 26                    | 41% | 42                       | 45% | 68           |
|                        | <b>Total*</b>                                                 | 64                    |     | 93                       |     | N/A          |

281 \*This does not reflect column total as findings/recommendations from one team frequently

282 matched (fully or partially) two or more from the other team

283

284 **Comparison of recommendations**

1  
2  
3 285 Quantitative comparison of recommendations is presented in Table 4. The RA generated 64  
4  
5 286 recommendations, a third less than the TA. 18 of the RA recommendations matched to 32 of those  
6  
7 287 from the TA, for example:

8  
9 288

10  
11 289 *“Require future recruits to have achieved the minimum numeracy/literacy standard.”*

12  
13 290 *TA recommendation*

14  
15 291

16  
17 292 *“Be clear on the necessary baseline skills in numeracy and literacy that are required.”*

18  
19 293 *RA recommendation*

20  
21 294

22  
23 295 There were partial matches between 20 RA and 26 TA recommendations, for example.

24  
25 296

26  
27 297 *“Ensure robust lines of communication are in place between Home Birth Service and community  
28  
29  
30  
31 298 midwives.” TA recommendation*

32  
33 299

34  
35 300 *“Routinely feed back to referring professionals to confirm booking with Home Birth Service, or  
36  
37 301 transfer back to community midwives.” RA recommendation*

38  
39 302

40  
41 303 A further 26 (41%) of the RA recommendations, and 42 (43%) of the TA recommendations had no  
42  
43 304 match. Reasons are presented with examples in Table5.

44  
45 305

46  
47 306 The most common reason was that the other team did not identify a particular recommendation, RA  
48  
49 307 did not find 18 (35%) and TA did not find 3 (12%). Four of these TA recommendations related to  
50  
51 308 training of midwives, three were about organisation of meetings, and the remainder had no  
52  
53 309 common theme. The researchers determined that the midwife training recommendations were  
54  
55 310 important, and had been an analytical blind spot for the RA team. Other mismatched



1  
2  
3 311 recommendations were collectively determined to be of low importance by the researchers, except  
4  
5 312 for the TA team's recommendation about projected milestones for the service.  
6

7 313

8  
9 314 The RA team made 19 recommendations based on 'what wasn't in the data', interpreting beyond  
10  
11 315 the reported facts. The TA team made 15 recommendations which the RA team did not support, as  
12  
13 316 their contextual knowledge deemed them unworkable or inappropriate. Nine recommendations that  
14  
15 317 were not found were from the TA team who made a detailed list of items for a future service dataset  
16  
17 318 while the RA team provided less specific recommendations regarding a future data set. Finally, four  
18  
19 319 recommendations were determined to be made due to contextual knowledge of the RA researchers.  
20  
21  
22  
23  
24  
25  
26  
27  
28  
29  
30  
31  
32  
33  
34  
35  
36  
37  
38  
39  
40  
41  
42  
43  
44  
45  
46  
47  
48  
49  
50  
51  
52  
53  
54  
55  
56  
57  
58  
59  
60

Table 5: suggested reason for mismatched findings and recommendations, with examples

|                 | Suggested reason for other team not eliciting finding/recommendation                      | Rapid analysis | Thematic analysis | Total     | Examples                                                                                                                                                                                                                   |
|-----------------|-------------------------------------------------------------------------------------------|----------------|-------------------|-----------|----------------------------------------------------------------------------------------------------------------------------------------------------------------------------------------------------------------------------|
| Findings        | Straightforward miss/error                                                                | 16             | 17                | 33        | "There has been no Audit against NICE guidelines for contact (number of visits)." - TA                                                                                                                                     |
|                 | Specific/detailed                                                                         | 10             | 11                | 21        | "Aromatherapy oils are expensive." TA                                                                                                                                                                                      |
|                 | Positive finding not reported                                                             | 15             | 0                 | 15        | "Initial engagement visits to community teams by HBT members facilitated implementation." RA                                                                                                                               |
|                 | Finding emerged from 'what is not in the data' - higher level interpretation              | 5              | 1                 | 6         | "It is not known whether current MSW recruits will be successful in the 45 credit [training] module, and how Service needs will be met if they are not." RA                                                                |
|                 | The embedded team's knowledge of the context meant they did not agree                     | 0              | 3                 | 3         | Examples suppressed as sensitive                                                                                                                                                                                           |
|                 | Suppressed as politically challenging                                                     | 0              | 2                 | 2         | Examples suppressed as sensitive                                                                                                                                                                                           |
|                 | <b>Total</b>                                                                              | <b>46</b>      | <b>34</b>         | <b>80</b> |                                                                                                                                                                                                                            |
| Recommendations | Straightforward miss/error                                                                | 3              | 18                | 21        | "Ensure that meetings are attended by as many of full and part-time workers as possible." TA                                                                                                                               |
|                 | Recommendation emerged from 'what is not in the data' - higher level interpretation       | 19             | 0                 | 19        | "Consider whether services which fall outside of 'standard' maternity care should be routinely offered, e.g. complementary therapies, hypnobirthing, pool provision, high frequency or duration of contact with women." RA |
|                 | Embedded RA team's contextual knowledge meant that they did not agree with recommendation | 0              | 15                | 15        | "Co-locate the HBS with other maternity services." TA – the RA team knew that this was not possible at the participating hospital trust.                                                                                   |
|                 | Specific/detailed recommendations for a service dataset or audit                          | 0              | 9                 | 9         | "Frequency of texts between mother and midwives could be retrospectively collated to demonstrate improved accessibility." TA                                                                                               |
|                 | Contextual knowledge was used to develop recommendation                                   | 4              | 0                 | 4         | "Ensure that the HBT midwives are sufficiently familiar with Birth Centre/Delivery Suite facilities and protocols." RA – the TA team assumed this would be the case already                                                |
|                 | <b>Total</b>                                                                              | <b>26</b>      | <b>42</b>         | <b>68</b> |                                                                                                                                                                                                                            |

1  
2  
3 320 **DISCUSSION**

4  
5 321

6  
7 322 **Principal findings**

8  
9 323 This study compared rapid and thematic analysis methods applied to the same dataset, to explore  
10  
11 324 whether RA provides timely, accurate outputs for services. RA data management took around a third  
12  
13 325 of the time of TA (43 v 116.5 hours). RA took 100 hours, and TA 126.5 hours in total, but RA  
14  
15 326 interpretation and write up took more than 6 times longer than TA (52 v 8 hours). RA findings  
16  
17 327 accounted for 79% of those from the TA, and TA accounted 63% of the RA findings. RA  
18  
19 328 recommendations accounted for 55% of those from the TA, and TA accounted for 59% of the RA  
20  
21 329 recommendations.  
22

23  
24 330

25  
26 331 **Strengths and limitations of the study**

27  
28 332

29  
30 333 Strengths and limitations in the RA and TA processes

31  
32 334 The qualitative analysis processes followed by each team have been described in detail to enhance  
33  
34 335 reproducibility and reliability. The characteristics of the researchers are acknowledged and explored.  
35  
36 336 Researchers were similar in that they were all experienced postdoctoral health services researchers,  
37  
38 337 working in the same Institute for some time, arguably with similar culture. There were differences  
39  
40 338 between the researchers (see Table 5). These factors may have conferred variation in analysis and  
41  
42 339 interpretation.  
43

44  
45 340

46  
47 341 The RA team had greater contextual knowledge resulting from previous clinical exposure as health  
48  
49 342 professionals, and working closely with the service. This appeared to impart an underlying level of  
50  
51 343 understanding that was critical to the findings and particularly recommendations. RA in a health  
52  
53 344 service setting without this background knowledge may be inappropriate. Around a third of RA  
54  
55 345 findings were not accounted for by the TA:RA generated a large number of additional findings,  
56  
57

1  
2  
3 346 suggesting that closeness to the field and data may have conferred an advantage. It has been  
4  
5 347 recommended previously that contextual information should be provided to secondary analysts to  
6  
7 348 mitigate the lack of exposure to the field.[19] The intended comparison of methods and need to  
8  
9 349 avoid conferring between teams meant that the TA only received brief information, rather than the  
10  
11 350 rich, iterative contextual information that may be more typically provided within secondary analysis.  
12

13 351

14  
15 352 The RA was conducted for a specific group of stakeholders, and the interpretation, and crafting of  
16  
17 353 findings and recommendations was done with these individuals in mind. Though not conscious of  
18  
19 354 this at the time of analysis, on reflection we believe that this focus on a specific audience, in addition  
20  
21 355 to [researchers 1 and 2]'s relationship and sense of reciprocity with the service, may have resulted in  
22  
23 356 a more lengthy approach. This contrasts with the TA which was a 'desktop exercise', with no  
24  
25 357 commitment to the research participants, which we feel made the process more straightforward,  
26  
27 358 with less need for careful presentation of data.  
28

29  
30 359

31  
32 360 A second factor in explaining the lengthy RA is that it is the first time that [researchers 1 and 2] have  
33  
34 361 used RA. Adapting to a new method can take time and discipline is required not to refer to more  
35  
36 362 familiar, lengthier practices. However the number and detail in the findings and recommendations in  
37  
38 363 the RA (131, 62 respectively) was similar to those in the TA (153, 93). For qualitative researchers  
39  
40 364 trained in TA it may be difficult to wholly adopt the brevity required of RA.  
41

42  
43 365

44  
45 366 The TA was predominantly conducted by one researcher [researcher 4], providing fewer  
46  
47 367 opportunities for reflection in the TA development. The RA team also had the opportunity for  
48  
49 368 ongoing regular reflection due to shared office space, which may have enhanced but also  
50  
51 369 lengthened the process.  
52

53 370  
54  
55  
56  
57  
58  
59  
60

1  
2  
3 371 Our approach to this work was pragmatic, based on available researcher capacity, though in future  
4  
5 372 comparisons parity across the RA and TA researchers could be achieved by using two equal-sized  
6  
7 373 teams, with similar characteristics, and equal division of labour. Involving some or all of both teams  
8  
9 374 in data collection would provide equality in exposure and embeddedness.

10  
11 375

12  
13 376 Strengths and limitations in the comparison process

14  
15 377 This paper has provided an opportunity to explore and reflect on approaches to comparing  
16  
17 378 qualitative methods. The limited evidence base necessitated the development of the comparison  
18  
19 379 methodology. The study team regularly met to review the process, emerging findings and  
20  
21 380 interpretation to enhance the rigour of the exercise.

22  
23  
24 381

25  
26 382 The complexity of the process only became clear once the researchers began to compare the data.  
27  
28 383 Differences in style and the degree of 'polishing' of the content and language, and the resulting  
29  
30 384 impact on time taken, was not apparent until analyses were complete and outputs shared. In  
31  
32 385 addition, devising an approach to categorising and reporting mismatched findings and  
33  
34 386 recommendations took time and was not as intuitive.

35  
36  
37 387

38  
39 388 A further limitation is the fact that the comparison was conducted by the researchers themselves,  
40  
41 389 due to pragmatic resource constraints. While we acknowledged this and aimed to maintain  
42  
43 390 objectivity, there is clearly a risk of bias in interpretation, and future projects should consider  
44  
45 391 involving an independent, blinded third party to conduct the comparison.

46  
47 392

48  
49 393 An unexpected outcome of this study is that it has encouraged us to reflect deeply on our own  
50  
51 394 research practice, resulting in a better understanding of our methods and role. Future comparisons  
52  
53 395 may benefit from independent exploration of the researchers' individual processes alongside the  
54  
55 396 'outcomes' of time, findings and recommendations.

1  
2  
3 397

4  
5 398 The initial intention was to involve participants in reviewing the importance of mismatched findings  
6  
7 399 and recommendations. This was not practicable due to the unexpected length of time taken to  
8  
9 400 complete the comparison, and the need for service stakeholders to determine whether mismatches  
10  
11 401 would have been helpful many months in the past.

12  
13 402

14  
15 403 It is important to note that all researchers in this study were experienced in qualitative health  
16  
17 404 research using TA, and as such this study does not explore RA and TA for novice researchers.

18  
19 405

20  
21 406 Possible explanations for the differences in time taken to conduct analysis

22  
23 407 The time taken in the RA was much shorter at the data review and management stage, equating to  
24  
25 408 around two weeks less whole time equivalent (WTE) researcher time. This suggests that managing  
26  
27 409 data in this way within a short timeframe is possible. However, the interpretation and reporting  
28  
29 410 phase was much longer with RA (6.5 days versus one day in TA). A number of factors may have  
30  
31 411 contributed. Time saved in coding and data management may result in more time being required at  
32  
33 412 the interpretation stage in RA. This needs further exploration, RA only took three WTE researcher  
34  
35 413 days less than TA, which may be of little benefit to academic or health service stakeholders. There  
36  
37 414 are further possible explanations: the researchers' relationship with the service, the purpose of the  
38  
39 415 research, and the fact that the RA team were learning a new skill. This is explored earlier in the  
40  
41 416 strengths and limitations section.

42  
43 417

44  
45 418 Possible explanations for the difference in findings

46  
47 419 The RA findings accounted for 78 of the 153, or 79% of the findings delivered by the TA. This  
48  
49 420 considerable overlap indicates that TA, which codes all data, did not produce many additional  
50  
51 421 findings. This is consistent with others' findings comparing themes generated from different  
52  
53 422 analytical approaches.

423

424 The most common reason for mismatches in findings was that the researchers had not identified the  
425 issue in error, with a 'did-not-find rate' of around one in ten for both methods. This may indicate  
426 that qualitative researchers will never elicit perfectly overlapping findings, regardless of method.

427

428 A number of mismatches were accounted for by unconscious suppression of challenging findings,  
429 higher level interpretation, and differences in contextual knowledge leading to the rejection of  
430 findings. These explanations were more prevalent in the RA team, suggesting that embeddedness  
431 influences these processes (discussed earlier as a limitation). Between a quarter (RA) and a third (TA)  
432 of the mismatched findings were somewhat detailed, highlighting differences in natural reporting  
433 style, interpretation and prioritisation of what was meaningful. Again, this may arise between  
434 different researchers, regardless of method. Mays and Pope relate how observations are "*limited by*  
435 *definition to the perceptions and introspection of the investigator*,"[20] and variations in perception  
436 and introspection are inevitable between different individuals. There are different views regarding  
437 whether qualitative findings should be reproducible,[21] but we take the stance that subjectivity and  
438 individual variation make this impossible. This has been a useful exercise in reflexivity,  
439 demonstrating how experiences and unconscious processes impact on findings.

440

441 The TA team did not report positive findings, accounting for a further portion of the mismatch: this  
442 was attributed to differences in interpretation of the project scope, rather than analytical processes  
443 delivering different results. Also the TA team were aware that they would not be presenting findings  
444 to providers, meaning that they felt more able to be critical and candid.

445

446 Possible explanations for the difference in recommendations

447 The recommendations also demonstrated overlap, with around three out of five being accounted for  
448 by both teams. However, RA did not pick up a third of the TA recommendations. We perceive that

1  
2  
3 449 the majority reflected relevant but non-essential detail, and the 'make or break' recommendations  
4  
5 450 that were key to the sustainability of the service were not missed, though we acknowledge that this  
6  
7 451 is a subjective judgement. Arguably the most important recommendation missed related to training  
8  
9 452 midwives in administrative and management skills. This detail is consistent with the TA process,  
10  
11 453 where the data was explored in more depth, leading to more precise recommendations. However,  
12  
13 454 this pattern was not observed in the findings. A possible explanation is that the RA team, with the  
14  
15 455 eventual audience in mind, were more conservative in the number and detail of recommendations.  
16  
17 456 Over half of RA recommendations that the TA did not find were accounted for by higher level  
18  
19 457 interpretation and contextual knowledge, and just under half of the TA mismatched  
20  
21 458 recommendations were deemed inappropriate by the RA team due to contextual knowledge,  
22  
23 459 suggesting that embeddedness in the field confers advantages, separate from the method used.  
24  
25  
26  
27  
28  
29

460

461

## 462 **CONCLUSION**

32 463 This paper provides important insights into the time taken and outputs from rapid and thematic  
33  
34 464 qualitative analysis approaches. We found that the RA was appropriate and delivered valid findings  
35  
36 465 and recommendations, with reassuring but not complete overlap, with mismatches appearing to  
37  
38 466 relate to minor or detailed issues. RA enabled considerable time savings in management of data, but  
39  
40 467 may not be as rapid as assumed. This requires further testing, addressing the limitations identified,  
41  
42 468 to establish how much time experienced RA researchers can save, and whether this is of practical  
43  
44 469 benefit to services. Further work is also required to determine whether differences in outputs are  
45  
46 470 due to the analytical method, or other influences, and whether any differences are relevant and of  
47  
48 471 importance to stakeholders. The characteristics, conduct, and role of the researcher/s is key, and our  
49  
50 472 impression is that RA requires the researchers to be embedded in the field.  
51  
52

473



1  
2  
3 474 We do not advocate RA for granular exploration of complex questions, for example individuals'  
4  
5 475 experience of phenomena. It could be used to rapidly identify issues for further, in depth qualitative  
6  
7 476 exploration. RA represents one of many tools of the qualitative researcher's trade, with particular  
8  
9 477 potential for use in applied health research, when timely reporting is needed. We advocate further  
10  
11 478 work to identify the practical application and use of different rapid approaches in practice.  
12  
13  
14  
15  
16  
17  
18  
19  
20  
21  
22  
23  
24  
25  
26  
27  
28  
29  
30  
31  
32  
33  
34  
35  
36  
37  
38  
39  
40  
41  
42  
43  
44  
45  
46  
47  
48  
49  
50  
51  
52  
53  
54  
55  
56  
57  
58  
59  
60

For peer review only

**479 FUNDING**

480 'This work was supported by the National Institute for Health Research (NIHR) through the West  
481 Midlands Collaborations for Leadership in Applied Health Research and Care (CLAHRC-WM)  
482 programme. The work was developed independently by the authors, and the views expressed are  
483 those of the authors and not necessarily those of the NHS, the NIHR or the Department of Health.

484

**485 COMPETING INTERESTS**

486 Competing interests: All authors have completed the ICMJE uniform disclosure form  
487 at [www.icmje.org/coi\\_disclosure.pdf](http://www.icmje.org/coi_disclosure.pdf) and declare: no support from any organisation for the  
488 submitted work; no financial relationships with any organisations that might have an interest in the  
489 submitted work in the previous three years; no other relationships or activities that could appear to  
490 have influenced the submitted work.

491

**492 AUTHORS' CONTRIBUTIONS**

493 The original idea for the project was conceived by SK. The study was designed by BT with intellectual  
494 input from all authors. Primary data collection was conducted by BT. Rapid analysis of data was  
495 conducted by BT and CH, with input from SK. Thematic analysis of data was conducted by IL and LB,  
496 with input from SG. Comparison of time data was conducted by BT, and checked by CH and IL. Initial  
497 comparison of findings and recommendations was conducted by BT, CH, IL and SK, and all authors  
498 reviewed outputs from the comparison. The preliminary draft of the paper was written by BT. This  
499 was critically reviewed by CH, IL, SG and SK for important intellectual content and subsequent  
500 revisions to the paper were undertaken by BT as a result. Final approval of the version of the paper  
501 to be published was granted by BT, CH, IL, SG and SK, who all also agreed to be accountable for all  
502 aspects of the work in ensuring that questions relating to the accuracy or integrity of any part of the  
503 work are appropriately investigated and resolved.

504

1  
2  
3 505 **ACKNOWLEDGEMENTS**

4  
5 506 We are grateful to Louise Bentham who conducted thematic analysis of three of transcripts and  
6  
7 507 reviewed findings with IL.  
8

9 508

10  
11 509 We extend our thanks to the hospital trust, who initiated the primary research project and granted  
12  
13 510 permission for the work, and to the staff who gave up their time and shared their perspectives so  
14  
15 511 generously.  
16

17 512

18  
19 513 We are grateful to the Scientific Advisory Committee of the West Midlands Collaboration for  
20  
21 514 Leadership in Applied Health Research and Care, who provided feedback on initial findings and  
22  
23 515 interpretation.  
24

25 516

26  
27  
28 517 **DATA SHARING**

29  
30 518 Data is securely stored at the University of Birmingham in line with our information governance and  
31  
32 519 data protection policies. Due to the confidential nature of our qualitative data, which may identify  
33  
34 520 individuals even following anonymization, we have not made the data publicly available, in line with  
35  
36 521 our research permissions and consent.  
37

522 **LIST OF ABBREVIATIONS**

523

524 RA – Rapid Analysis

525 TA – Thematic Analysis

526 CLAHRC – Collaborations for Leadership in Applied Health Research and Care

527 MSW – Midwifery Support Worker

528

529

530 **REFERENCES**

531

- 532 1. Tariq S, Woodman J. **Using mixed methods in health research**. *JRSM Short Rep* 2013;  
533 **4(6):2042533313479197.**
- 534 2. Yardley L, Bishop FL. **Using mixed methods in health research: benefits and challenges**. *Br J*  
535 *Health Psychol* 2015;**20(1):1-4.**
- 536 3. Spiller K, Ball K, Daniel E, et al. **Carnavalesque collaborations: reflections on ‘doing’ multi-**  
537 **disciplinary research**. *Qual Res* 2015;**15(5):551-567.**
- 538 4. Garfield S, Jheeta S, Jacklin A, et al. **Patient and public involvement in data collection for**  
539 **health services research: a descriptive study**. *Research Involvement and Engagement*  
540 2015;**1(1):8.**
- 541 5. Martens PJ, Roos NP. **When health services researchers and policy makers interact: tales**  
542 **from the tectonic plates**. *Healthc Policy* 2005;**1(1):72-84.**
- 543 6. Gale N, Heath G, Cameron E, et al. **Using the framework method for the analysis of**  
544 **qualitative data in multi-disciplinary health research**. *BMC Med Res Methodol* 2013;**13:117.**
- 545 7. Ziebland S, McPherson A. **Making sense of qualitative data analysis: an introduction with**  
546 **illustrations from DIPEX (personal experiences of health and illness)**. *Med Educ*  
547 2006;**40(5):405-414.**

- 1  
2  
3 548 8. Beebe J. **Rapid assessment process: An introduction**. Walnut Creek, CA: Altamira Press  
4  
5 549 2003.  
6  
7 550 9. Burgess-Allen J, Owen-Smith V. **Using mind mapping techniques for rapid qualitative data**  
8  
9 551 **analysis in public participation processes**. *Health Expect* 2010;**13**(4):406-415.  
10  
11 552 10. Neal JW, Neal ZP, VanDyke E, et al. **Expediting the Analysis of Qualitative Data in**  
12  
13 553 **Evaluation: A Procedure for the Rapid Identification of Themes From Audio Recordings**  
14  
15 554 **(RITA)**. *Am J Eval* 2015;**36**(1):118-132.  
16  
17 555 11. Hamilton A. **Qualitative Methods in Rapid Turn-Around Health Services Research**. U.S.  
18  
19 556 Department of Veterans Affairs.  
20  
21 557 [http://www.hsrd.research.va.gov/for\\_researchers/cyber\\_seminars/archives/video\\_archive.c](http://www.hsrd.research.va.gov/for_researchers/cyber_seminars/archives/video_archive.c)  
22  
23 558 [fm?SessionID=780](http://www.hsrd.research.va.gov/for_researchers/cyber_seminars/archives/video_archive.c) (accessed Oct 2017).  
24  
25 559 12. Seale C, Charteris-Black J, MacFarlane A, et al. **Interviews and internet forums: a**  
26  
27 560 **comparison of two sources of qualitative data**. *Qual Health Res* 2010;**20**(5):595-606.  
28  
29 561 13. Putten JV, Nolen AL. **Comparing Results from Constant Comparative and Computer**  
30  
31 562 **Software Methods: A Reflection about Qualitative Data Analysis**. *J Ethnogr Qual Res*  
32  
33 563 2010;**5**(2):99-112.  
34  
35 564 14. Greenwood M, Kendrick T, Davies H, et al. **Hearing voices: Comparing two methods for**  
36  
37 565 **analysis of focus group data**. *Appl Nurs Res* 2017;**35**:90-93.  
38  
39 566 15. Collaboration for Leadership in Applied Health Research and Care West Midlands.  
40  
41 567 <http://www2.warwick.ac.uk/fac/med/about/centres/clahrc/> (accessed Oct 2017).  
42  
43 568 16. Braun V, Clarke V. **Using thematic analysis in psychology**. *Qual Res Psychol* 2006;**3**(2):83.  
44  
45 569 17. Ritchie J, Lewis J. **Qualitative research practice: a guide for social science students and**  
46  
47 570 **researchers**. London: Sage 2003.  
48  
49 571 18. Davies R. **Planning Evaluability Assessments: A Synthesis of the Literature with**  
50  
51 572 **Recommendations**. London, UK: DFID 2013.  
52  
53  
54  
55  
56  
57  
58  
59  
60

- 1  
2  
3 573 <https://assets.publishing.service.gov.uk/media/57a08a0d40f0b652dd000534/61141->  
4  
5 574 [DFIDWorkingPaper40-finalOct13.pdf/](#) (accessed Oct 2017).  
6  
7 575 19. Heaton J. **Secondary Analysis of Qualitative Data: An Overview.** *Hist Soc Res*  
8  
9 576 2008;**33**(3(125)):33-45.  
10  
11 577 20. Mays N, Pope C. **Rigour and qualitative research.** *Br Med J (Clin Res Ed)*  
12  
13 578 1995;**311**(6997):109-112.  
14  
15 579 21. Dixon-Woods M, Shaw R, Agarwal S, et al. **The problem of appraising qualitative research.**  
16  
17 580 *Qual Saf Health Care* 2004;**13**(3):223-225.  
18  
19 581

## Summary Template

| Home Birth Service Exploratory Review Summary Template                                                                                                                                                            |  |
|-------------------------------------------------------------------------------------------------------------------------------------------------------------------------------------------------------------------|--|
| PREPARED BY:                                                                                                                                                                                                      |  |
| DATE:                                                                                                                                                                                                             |  |
| DATA TYPE (document, interview transcript, focus group transcript):                                                                                                                                               |  |
| FOR INTERVIEWS AND FOCUS GROUPS:                                                                                                                                                                                  |  |
| <i>PARTICIPANT IDENTIFIER/S</i>                                                                                                                                                                                   |  |
| <i>PARTICIPANT ROLE</i>                                                                                                                                                                                           |  |
| <i>PARTICIPANT ROLE IN THE HBS</i>                                                                                                                                                                                |  |
| FOR DOCUMENTS:                                                                                                                                                                                                    |  |
| TITLE                                                                                                                                                                                                             |  |
| DATE OF PRODUCTION                                                                                                                                                                                                |  |
| AUTHOR                                                                                                                                                                                                            |  |
| RATIONALE FOR IMPLEMENTING HBS (POLICY, EVIDENCE, OTHER)                                                                                                                                                          |  |
| What was the problem, what was going wrong?                                                                                                                                                                       |  |
| What was the vision (envisaged outputs, outcomes, impact)                                                                                                                                                         |  |
| TRAINING:                                                                                                                                                                                                         |  |
| PROGRAMME THEORY/LOGIC MODEL:                                                                                                                                                                                     |  |
| <i>INPUTS (resources, people)</i>                                                                                                                                                                                 |  |
| <i>ACTIVITIES (what workers do, e.g. promotional work, clinical care)</i>                                                                                                                                         |  |
| <i>OUTPUTS (what activities deliver, e.g. women informed about the HBS, women receive intrapartum care at home) and OUTCOMES (results of the outputs, e.g. women book with the HBS, women give birth at home)</i> |  |
| <i>IMPACT/GOAL (overall aims of programme, e.g. home birth booking rate increases, home birth rate increases)</i>                                                                                                 |  |
| FACILITATORS of IMPLEMENTATION                                                                                                                                                                                    |  |
| Planning/process                                                                                                                                                                                                  |  |
| People                                                                                                                                                                                                            |  |
| Culture                                                                                                                                                                                                           |  |
| Money                                                                                                                                                                                                             |  |
| Organisation/bureaucracy                                                                                                                                                                                          |  |
| Evidence/policy                                                                                                                                                                                                   |  |
| Other                                                                                                                                                                                                             |  |
| BARRIERS TO IMPLEMENTATION AND SOLUTIONS                                                                                                                                                                          |  |
| Planning/process                                                                                                                                                                                                  |  |
| People                                                                                                                                                                                                            |  |
| Culture                                                                                                                                                                                                           |  |
| Money                                                                                                                                                                                                             |  |
| Organisation/bureaucracy                                                                                                                                                                                          |  |
| Evidence/policy                                                                                                                                                                                                   |  |
| Other                                                                                                                                                                                                             |  |
| ROUTINELY GATHERED DATA (HOW,WHERE, WHEN, WHO COLLECTED, WHERE DATA HELD)                                                                                                                                         |  |
| KEY DOCUMENTS WE SHOULD INCLUDE (e.g. service specification)                                                                                                                                                      |  |
| OTHER IMPORTANT OBSERVATIONS                                                                                                                                                                                      |  |
| IMPORTANT QUOTATIONS                                                                                                                                                                                              |  |
| REFLECTIONS ON THE DATA COLLECTION EPISODE                                                                                                                                                                        |  |

# BMJ Open

## Can rapid approaches to qualitative analysis deliver timely, valid findings to clinical leaders? A mixed methods study comparing rapid and thematic analysis

|                                 |                                                                                                                                                                                                                                                                                                                                                                                                                                                                                                        |
|---------------------------------|--------------------------------------------------------------------------------------------------------------------------------------------------------------------------------------------------------------------------------------------------------------------------------------------------------------------------------------------------------------------------------------------------------------------------------------------------------------------------------------------------------|
| Journal:                        | <i>BMJ Open</i>                                                                                                                                                                                                                                                                                                                                                                                                                                                                                        |
| Manuscript ID                   | bmjopen-2017-019993.R1                                                                                                                                                                                                                                                                                                                                                                                                                                                                                 |
| Article Type:                   | Research                                                                                                                                                                                                                                                                                                                                                                                                                                                                                               |
| Date Submitted by the Author:   | 16-May-2018                                                                                                                                                                                                                                                                                                                                                                                                                                                                                            |
| Complete List of Authors:       | Taylor, Beck; University of Birmingham, Institute of Applied Health Research<br>Henshall, Catherine; University of Birmingham, Institute of Applied Health Research; Oxford Brookes University, OxINMAHR, Faculty of Health and Life Sciences<br>Litchfield, Ian; University of Birmingham, Institute of Applied Health Research<br>Kenyon, Sara; University of Birmingham, Institute of Applied Health Research<br>Greenfield, Sheila; University of Birmingham, Institute of Applied Health Research |
| <b>Primary Subject Heading</b>: | Qualitative research                                                                                                                                                                                                                                                                                                                                                                                                                                                                                   |
| Secondary Subject Heading:      | Health services research, Research methods                                                                                                                                                                                                                                                                                                                                                                                                                                                             |
| Keywords:                       | QUALITATIVE RESEARCH, HEALTH SERVICES ADMINISTRATION & MANAGEMENT, Maternal medicine < OBSTETRICS                                                                                                                                                                                                                                                                                                                                                                                                      |
|                                 |                                                                                                                                                                                                                                                                                                                                                                                                                                                                                                        |

SCHOLARONE™  
Manuscripts



1  
2  
3 1 **Can rapid approaches to qualitative analysis deliver timely, valid findings to clinical leaders? A**  
4 2 **mixed methods study comparing rapid and thematic analysis**  
5 3  
6 4  
7 5  
8 6

9 7 **Beck Taylor<sup>a</sup>**

10 8 [r.taylor.3@bham.ac.uk](mailto:r.taylor.3@bham.ac.uk)

11 9 Telephone: +44 (0)121 414 2848  
12 10

13 11 **Catherine Henshall<sup>a,i</sup>**

14 12 [chenshall@brookes.ac.uk](mailto:chenshall@brookes.ac.uk)

15 13 Telephone: +44 (0)7768 918298  
16 14

17 15 **Ian Litchfield<sup>a,\*</sup>**

18 16 [i.litchfield@bham.ac.uk](mailto:i.litchfield@bham.ac.uk)

19 17 Telephone: +44 (0)121 414 6006  
20 18

21 19 **Sara Kenyon<sup>a</sup>**

22 20 [s.kenyon@bham.ac.uk](mailto:s.kenyon@bham.ac.uk)

23 21 Telephone: +44 (0)121 414 9063  
24 22

25 23 **Sheila Greenfield<sup>a</sup>**

26 24 [s.m.greenfield@bham.ac.uk](mailto:s.m.greenfield@bham.ac.uk)

27 25 Telephone: +44 (0)121 414 6493  
28 26  
29 27

30 28 <sup>a</sup>**Affiliate address for all authors and current address for all except C Henshall:** Institute of Applied  
31 29 Health Research, College of Medical and Dental Sciences, University of Birmingham, Edgbaston,  
32 30 Birmingham, B15 2TT, United Kingdom  
33 31

34 32 <sup>i</sup>**Present address:** OxINMAHR, Oxford Brookes University, Faculty of Health and Life Sciences, The  
35 33 Colonnade, Gipsy Lane, Headington, Oxford, OX3 0BP, United Kingdom  
36 34

37 35 **\*Corresponding author**  
38 36  
39 37  
40 38  
41 39  
42 40  
43 41  
44 42  
45 43  
46 44  
47 45  
48 46  
49 47  
50 48  
51 49  
52 50  
53 51  
54 52  
55 53  
56 54  
57 55  
58 56  
59 57  
60 58

1  
2  
3 51 **ABSTRACT**  
4

5 52 **Objectives:** This study compares rapid and traditional analyses of a UK health service evaluation  
6  
7 53 dataset, to explore differences in researcher time, and consistency of outputs.  
8

9 54 **Design:** Mixed methods study, quantitatively and qualitatively comparing qualitative methods  
10

11 55 **Setting:** Data from a home birth service evaluation study in a hospital in the English National Health  
12  
13 56 Service which took place between October-December 2014. Two research teams independently  
14  
15 57 analysed focus group and interview transcript data: one team used a Thematic Analysis approach  
16  
17 58 using the Framework Method, and the second used Rapid Analysis.  
18

19 59 **Participants:** Home birth midwives (6), midwifery support workers (4), commissioners (4), managers  
20  
21 60 (6), and community midwives (12) and a patient representative (1) participated in the original study.  
22  
23

24 61 **Interventions:** None  
25

26 62 **Primary outcome measures:** Time taken to complete analysis in person hours; analysis findings and  
27  
28 63 recommendations matched, partially matched, or not matched across the two teams.  
29

30 64 **Results:** Rapid Analysis data management took less time than Thematic Analysis (43 v 116.5 hours).  
31  
32 65 Rapid Analysis took 100 hours, and Thematic Analysis 126.5 hours in total, with interpretation and  
33  
34 66 write up taking much longer in the Rapid Analysis (52 v 8 hours). Rapid Analysis findings overlapped  
35  
36 67 with 79% of Thematic Analysis findings, and Thematic Analysis overlapped with 63% of the Rapid  
37  
38 68 Analysis findings. Rapid Analysis recommendations overlapped with 55% of those from the Thematic  
39  
40 69 Analysis, and Thematic Analysis overlapped with 59% of the Rapid Analysis recommendations.  
41

42 70 **Conclusions:** Rapid Analysis delivered a modest time saving. Excessive time to interpret data in Rapid  
43  
44 71 Analysis in this study may be due to differences between research teams. There was overlap in  
45  
46 72 outputs between approaches, more in findings than recommendations. Rapid Analysis may have the  
47  
48 73 potential to deliver valid, timely findings while taking less time. We recommend further comparisons  
49  
50 74 using additional data sets with more similar research teams.  
51  
52

53 75  
54

55 76 **Keywords**  
56  
57  
58  
59  
60

1  
2  
3 77 Qualitative Research

4  
5 78 Health Services Administration & Management

6  
7 79 Maternal Medicine

8  
9 80

10  
11 81 **Strengths and limitations of this study**

- 12  
13 82 • Our study explores a strategy to address the time-lag in reporting qualitative findings to  
14  
15 83 clinicians and policymakers, which slows translation of research into practice.  
16  
17 84 • This is the first comparison of qualitative analytical methods in applied health research  
18  
19 85 which compares both researcher time *and* outputs, with a complete study dataset.  
20  
21 86 • The work describes the process of comparing time and analytical outputs in detail, to inform  
22  
23 87 others planning further methodological comparisons.  
24  
25 88 • Due to the time lag in thematic analysis outputs, our study did not triangulate findings with  
26  
27 89 the original participants.  
28  
29 90 • The study uncovered important challenges in comparing analytical approaches between  
30  
31 91 research teams which can inform the design future work in this area.  
32  
33  
34  
35  
36  
37  
38  
39  
40  
41  
42  
43  
44  
45  
46  
47  
48  
49  
50  
51  
52  
53  
54  
55  
56  
57  
58  
59  
60

## 92 BACKGROUND

93 Applied health research frequently adopts mixed methods, often using qualitative approaches.[1]  
94 Applications of qualitative methods include: early work to identify areas for focus; throughout a  
95 study to explore processes and user experience; following a trial or intervention implementation to  
96 explain outcomes and/or identify stakeholder experiences, to explore in more depth questions or  
97 issues identified through quantitative work; to problematise or ‘unpack’ issues or topics taken for  
98 granted.[2] Increasingly this type of research can include a broader range of contributors, for  
99 example where members of the public, patients, clinicians, and researchers are involved in analysing  
100 and interpreting data to ensure a multi-disciplinary perspective, or pragmatically using several  
101 researchers to code data in the interests of time.[3, 4]  
102  
103 Typically stakeholders want rapid results,[5-7] yet compared with quantitative approaches,  
104 traditional qualitative approaches often considerable time is required to manage and interpret data,  
105 and deliver findings.[8, 9] In a service context, delays may render the findings out of date, reducing  
106 their applicability and relevance. There are examples of apparently more rapid alternatives to  
107 traditional qualitative approaches, including specific end-to-end approaches such as Rapid  
108 Assessment Process and Rapid Ethnography.[6, 9-13] There are four broad areas where time can be  
109 saved; by reducing data collection time, for example by allowing less time between data collection  
110 episodes;[6] by reducing data management time, for example by relying on untranscribed audio  
111 recordings, notes, summaries and mind maps;[10-12] by minimising the time spent analysing data by  
112 summarising as opposed to formally coding;[11, 13] by limiting the time spent on analysis by using a  
113 ‘one sheet of paper’ summary to explore a sample of a large pre-coded dataset.[9] Often rapid  
114 methods describe a broad approach, including activities from entering the field through to delivery  
115 of findings, and/or involve mixed methods.[6, 7] This paper specifically explores whether rapid  
116 *analysis* of qualitative data (distinct from end-to-end rapid methods) delivers equivalent findings to  
117 traditional approaches, and how much time may be saved in practice.

118

119 There are a limited number of studies that have compared different qualitative analytical  
120 techniques.[11, 14-16] In some of the empirical examples identified, methodologists have  
121 predominantly compared methods of data collection (e.g. interviews versus internet forums[14]),  
122 and focused on the number and content of codes rather than interpretation. Of the three examples  
123 identified that compare analytical approaches one used focus group data to compare thematic  
124 analysis of a partial dataset with mind-mapping of a full dataset.[11] While this paper provides  
125 minimal detail regarding the method of comparison, it reported differences in time taken to analyse  
126 the data, and in the number and presentation of codes. The second example compared software-  
127 assisted and constant comparative approaches to analysis describing differences in the frequency of  
128 codes and coding levels.[15] The third example compared analysis of focus group data directly from  
129 audio recordings, with thematic analysis of transcribed data, and found that themes generated were  
130 comparable.[16]

131

132 The work we present here was conducted as part of the Collaboration for Leadership in Applied  
133 Health Research and Care (CLAHRC) programme in the West Midlands of England. CLAHRC involves  
134 local teams across Universities and National Health Service organisations working in partnership to  
135 deliver research to improve services for patient benefit.[17] As part of a service evaluation study of a  
136 new home birth service, we gathered interview, focus group and documentary data. We then  
137 compared the speed and outputs of rapid and traditional techniques applied to the same dataset.  
138 For the Rapid Analysis (RA) we used the approach developed by Hamilton at UCLA.[13] We  
139 compared this with Thematic Analysis (TA)[18] and the Framework Method which was selected due  
140 to the team's existing familiarity with this approach, and the fact that it is increasingly applied in  
141 multidisciplinary health services research.[8, 19]

142

143 **METHOD**

1  
2  
3 144 This study compares rapid and traditional analyses of a UK health service evaluation dataset, to  
4  
5 145 explore differences in researcher time, and consistency of outputs. This was a mixed methods study,  
6  
7 146 quantitatively and qualitatively comparing the outputs of qualitative methods.  
8

9 147

## 10 11 148 **SETTING**

12  
13 149 The data came from a home birth service evaluation study in a hospital in the English National  
14  
15 150 Health Service which took place between October-December 2014. This was a service innovation  
16  
17 151 put into place by the hospital. A dedicated team of midwives was set up to provide antenatal, birth  
18  
19 152 and postnatal care to women choosing to have a home birth, with the aim of providing a more  
20  
21 153 reliable service, and increasing the local home birth rate.  
22

23  
24 154

## 25 26 155 **Characteristics of participants**

27  
28 156 Home birth midwives (6), midwifery support workers (4), commissioners (4), managers (6), and  
29  
30 157 community midwives (12) and a patient representative (1) participated in the original study.  
31

32 158

## 33 34 159 **Description of processes, interventions and comparisons**

35  
36 160 In the original evaluation, an evaluability assessment approach was adopted,[20] and its specific  
37  
38 161 objectives were to: establish the original programme design and how the service differed from this  
39  
40 162 design and why; identify facilitators or barriers to implementation; establish what service data are  
41  
42 163 available, and how it is being /could be gathered; identify how staff would develop/improve the  
43  
44 164 service. The evaluation was a qualitative study, involving interviews and focus groups with key  
45  
46 165 participants involved in the home birth service.  
47

48  
49 166

50  
51 167 Twenty three provider and commissioning staff and one patient representative were purposively  
52  
53 168 sampled, with recruitment by direct email or telephone invite, with three unable to take part due to  
54  
55 169 availability. Twenty one semi-structured interviews informed by the study objectives were  
56

1  
2  
3 170 conducted by [researcher 1] at participants' workplaces. A single focus group of 12 midwives was  
4  
5 171 facilitated by [researcher 1] and [researcher 2], also structured according to the study objectives. A  
6  
7 172 convenience sampling approach was taken for the focus group, with midwives available at the  
8  
9 173 allotted time invited to take part at their workplace. Participants were not known to researchers  
10  
11 174 prior to the study. Interviews and the focus group lasted approximately one hour, were digitally  
12  
13 175 recorded and transcribed for analysis, with minimal field notes taken. Participants did not review  
14  
15 176 transcripts. Eight key service documents were also utilised in the analysis (business case, service  
16  
17 177 guidelines, commissioning policy). The primary service review and secondary analysis were reviewed  
18  
19 178 by the University of Birmingham Ethics Committee, ref ERN\_15-0127S. Local approval was obtained  
20  
21 179 from the hospital Research and Development Team. The data was analysed independently using  
22  
23 180 firstly RA and secondly TA as described in detail below. All researchers work in applied health  
24  
25 181 research in the same department of a UK University. Researcher 1 is a public health physician,  
26  
27 182 Researcher 2 is a registered nurse, Researcher 3 is a registered midwife. Researchers 4 and 5 are  
28  
29 183 health service researchers, Researcher 6 is a medical sociologist. A summary and comparison of the  
30  
31 184 process used for the two analyses is shown in Table 1. The work was undertaken using a  
32  
33 185 theoretically interpretive, generic qualitative approach across both teams.  
34  
35  
36  
37  
38  
39 186

38 187 The primary Rapid Analysis (RA) ([researcher 1], [researcher 2], [researcher 3]))  
39  
40 188 RA was conducted between November and December 2014: this constituted the primary empirical  
41  
42 189 work which was subsequently reported to the service. The rapid qualitative analysis approach  
43  
44 190 used[13] was designed to deliver timely findings with methodological rigour. The approach includes  
45  
46 191 guidance on data collection and report writing and was developed using teams of less experienced  
47  
48 192 researchers. Here we have used only the analytical methodology and researchers experienced in  
49  
50 193 qualitative methods. Hamilton relates how the reduced timeframe of rapid methods means that  
51  
52 194 they tend to be more deductive and explanatory than inductive and exploratory.[13] It can be  
53  
54 195 hypothesised that this may negatively impact on the ability of rapid methods to discover more  
55  
56  
57  
58  
59  
60

1  
2  
3 196 'hidden' phenomena which one associates with traditional qualitative methods, and this must be  
4  
5 197 balanced with the speed at which rapid methods can deliver findings . In recognition of this, the  
6  
7 198 work presented here incorporated both inductive and deductive approaches, using a deductive  
8  
9 199 template to structure analysis, with explicit remit to highlight other issues which emerged  
10  
11 200 inductively from the data, though the focus was on inductive analysis. The process is presented in  
12  
13 201 detail in Table 1. Researchers spent approximately one hour with each transcript or document, as  
14  
15 202 stipulated by Hamilton in her description of the approach, noting key issues in a one-sheet,  
16  
17 203 structured 'summary template', with no formal coding. The data entered into the summary  
18  
19 204 templates focused on the main issues in the data, rather than every single issue that surfaced. The  
20  
21 205 RA summary template was made up of a number of sections describing participant and data  
22  
23 206 collection details, and deductive and inductive headings. At the end of the template there were  
24  
25 207 further sections to record key documents, observations, quotations, and reflections relating to the  
26  
27 208 data collection episode. The deductive aspects of the initial summary template were developed  
28  
29 209 from the research questions: rationale for implementing the home birth service, programme design  
30  
31 210 (structured according to logic model domains), facilitators and barriers to implementation, and  
32  
33 211 routinely gathered data about the service. This template was tested by both RA researchers as  
34  
35 212 described in Table 1. During this early testing process it was deemed necessary to inductively  
36  
37 213 develop a small number of additional subheadings for three of the template sections (rationale,  
38  
39 214 barriers, facilitators), to help the researchers to organise the data. Although the use of more  
40  
41 215 focused approaches has been highlighted to be of value when interpreting data for reporting in a  
42  
43 216 health service context, the need to maintain a thorough and transparent process must go hand in  
44  
45 217 hand with producing findings which are easily understood and relevant to stakeholders.[11] The  
46  
47 218 summary template accompanies this paper (Supplementary File 1). Summarised data was explored  
48  
49 219 with respect to the research objectives, to produce a report summarising findings and  
50  
51 220 recommendations.  
52  
53  
54  
55 221



1  
2  
3 222 Secondary Thematic Analysis using the Framework Method (TA) ([researcher 4], [researcher 5],  
4  
5 223 [researcher 6])  
6  
7 224 The secondary analysis was conducted by [researcher 4] between June and September 2015, after  
8  
9 225 the original RA was complete, with oversight and support from [researchers 5 and 6]; all three are  
10  
11 226 experienced qualitative applied health researchers from outside of the original team. Typically, the  
12  
13 227 purpose of secondary analysis is to explore new research questions,[21]but in this case secondary  
14  
15 228 analysis was performed using a different method to meet the same objectives as the primary  
16  
17 229 analysis, to compare the outputs of the two methods. The original team ([researchers 1, 2 and 3])  
18  
19 230 provided brief contextual details about the field, the organisations and participants involved, and the  
20  
21 231 background to the project. No further discussion occurred, to avoid revealing RA findings to the TA  
22  
23 232 team. The TA was informed by the original research objectives, using an inductive approach, and  
24  
25 233 following the steps set out in the Framework Method, an approach to thematic analysis developed  
26  
27 234 by Ritchie and Lewis:[8, 19] familiarisation, coding, developing a framework, applying the  
28  
29 235 framework, charting data into the framework, interpreting data, and writing up. Table 1 summarises  
30  
31  
32 236 the process

237 **Table 1: Description of the Rapid Analysis and Thematic Analysis**

|                                    |                | Rapid Analysis                                                                                                                                                                                                                                                                                                                                                                                                                                                             | Thematic Analysis                                                                                                                                                                                                                                                                                                                                                                          |
|------------------------------------|----------------|----------------------------------------------------------------------------------------------------------------------------------------------------------------------------------------------------------------------------------------------------------------------------------------------------------------------------------------------------------------------------------------------------------------------------------------------------------------------------|--------------------------------------------------------------------------------------------------------------------------------------------------------------------------------------------------------------------------------------------------------------------------------------------------------------------------------------------------------------------------------------------|
| The researchers                    |                | Clinical background<br>Embedded in the field<br>First time using RA<br>Shared office, opportunity to interact<br>Evenly shared workload<br>Main focus of work<br>Conducted over short period<br>Focused on producing and 'crafting'* outputs for known stakeholders                                                                                                                                                                                                        | Not clinical<br>No prior exposure to field<br>Experienced in TA – no need to 'learn'<br>No informal interaction/reflection<br>[Researcher 4] conducted most of the analysis<br>Conducted alongside other core work Project delivered over a longer period<br>Less focused on the needs and expectations of stakeholders                                                                    |
| Epistemological position           |                | Theoretically interpretive, generic qualitative approach                                                                                                                                                                                                                                                                                                                                                                                                                   | Theoretically interpretive, generic qualitative approach                                                                                                                                                                                                                                                                                                                                   |
| Data collection                    |                | Interviews, focus groups conducted, documents gathered from participants by [researcher 1], [researcher 2] facilitating focus group.                                                                                                                                                                                                                                                                                                                                       | Provided with pre-gathered dataset.                                                                                                                                                                                                                                                                                                                                                        |
| Transcription                      |                | Audio recordings transcribed by third party. Transcripts checked for accuracy by researcher. Participant name retained in transcript                                                                                                                                                                                                                                                                                                                                       | Pseudoanonymised transcripts and documents provided.                                                                                                                                                                                                                                                                                                                                       |
| Timing                             |                | During and following data collection process.                                                                                                                                                                                                                                                                                                                                                                                                                              | Analysis conducted post-data collection.                                                                                                                                                                                                                                                                                                                                                   |
| Ordering                           |                | Interviews, then focus groups, then documents. Strategic participant data analysed first.                                                                                                                                                                                                                                                                                                                                                                                  | Documents, then interviews with strategic participants first , finally the focus groups                                                                                                                                                                                                                                                                                                    |
| 'Data management and review' stage | Early analysis | [researchers 1 and 2] dual analysed one interview transcript, inserting them into a 'summary template', organised according to the research objectives (see Supplementary File 1). They compared template content. The process and the template structure were reviewed and amended (some subheadings applied). A second transcript was subsequently dual analysed in the same way. The 'one hour per transcript' rule was not applied here, spending 1.5-2 hours on each. | An identical sample of three transcripts reflecting a range of job title and seniority were analysed independently by [researchers 4 and 5] and the themes that emerged discussed and finalised. These themes were arranged into analytical hierarchies i.e. consisting of the key themes and associated sub-themes and these formed the basis for the codification of the remaining data. |
|                                    | Main analysis  | Remaining data items allocated equally to [researchers 1 and 2], following the same process, limiting time to one hour maximum per data item (less for some less complex documents). Researcher entered information directly into a matrix, structured as the                                                                                                                                                                                                              | [Researchers 4] independently analysed the remainder of the transcripts and the resulting themes and sub-themes were agreed with [Researcher 5] and formed the analytical hierarchy for the remaining data.                                                                                                                                                                                |

1  
2  
3  
4  
5  
6  
7  
8  
9  
10  
11  
12  
13  
14  
15  
16  
17  
18  
19  
20  
21  
22  
23  
24  
25  
26  
27  
28  
29  
30  
31  
32  
33  
34  
35  
36  
37  
38  
39  
40  
41  
42  
43  
44  
45  
46  
47

|                        |                      |                                                                                                                                                                                                                                                                                                                                                                                                                                                                                                                                                  |                                                                                                                                                                                                                                                                                                                                                                                                                                                                                                                                                                                                                                                                                                                                                                                                                                                                                                                                                                                  |
|------------------------|----------------------|--------------------------------------------------------------------------------------------------------------------------------------------------------------------------------------------------------------------------------------------------------------------------------------------------------------------------------------------------------------------------------------------------------------------------------------------------------------------------------------------------------------------------------------------------|----------------------------------------------------------------------------------------------------------------------------------------------------------------------------------------------------------------------------------------------------------------------------------------------------------------------------------------------------------------------------------------------------------------------------------------------------------------------------------------------------------------------------------------------------------------------------------------------------------------------------------------------------------------------------------------------------------------------------------------------------------------------------------------------------------------------------------------------------------------------------------------------------------------------------------------------------------------------------------|
|                        |                      | template, using individual templates duplicated work.                                                                                                                                                                                                                                                                                                                                                                                                                                                                                            |                                                                                                                                                                                                                                                                                                                                                                                                                                                                                                                                                                                                                                                                                                                                                                                                                                                                                                                                                                                  |
| 'Interpretation' stage | Data interpretation  | [Researchers 1 and 2] reviewed content in one another's matrices, and combined them. Data were allocated equally to [researchers 1 and 2] for interpretation and write up, organised according to the template, e.g. facilitators to implementation. The 'barriers' section was more complex, and this was subdivided it into themes which were allocated to [researchers 1 or 2], e.g. training, promotion and recruitment. A summary of findings and a set of recommendations were produced for each. Summaries were reorganised thematically. | <p>[Researcher 1] undertook interpretation and write-up of the findings according to the thematic headings.</p> <p>For each theme and sub-theme an explanatory sentence was produced and an exemplar quote or quotes was selected.</p> <p>These themes and sub-themes were used to create a list of findings specific to each overarching theme.</p>                                                                                                                                                                                                                                                                                                                                                                                                                                                                                                                                                                                                                             |
|                        | Final report writing | Summaries of findings and recommendations were combined and checked by [Researchers 1, 2 and 3] to eliminate duplication and reach consensus regarding interpretation, revisiting the primary data where necessary.                                                                                                                                                                                                                                                                                                                              | <p>These findings were used to inform a final report, populating the template provided by [researcher 1]. The report template included the following headings:</p> <ol style="list-style-type: none"> <li>1) Participants and data (not written up in secondary analysis)</li> <li>2) Timeline for development of Service</li> <li>3) Service design (logic models developed for intended and actual service design)</li> <li>4) Achievements</li> <li>5) Challenges             <ol style="list-style-type: none"> <li>5.1) Barriers to implementing the model as intended</li> <li>5.2) Barriers to delivering specific Service outcomes</li> </ol> </li> <li>6) Service data             <ol style="list-style-type: none"> <li>6.2) Data being gathered</li> <li>6.3) Responsibility for data collection/entry/analysis</li> <li>6.4) What's going well in HBS data capture and use</li> <li>6.5) Data-related challenges</li> </ol> </li> <li>7) Recommendations</li> </ol> |
| Researcher interaction |                      | [Researchers 1, 2 and 3] reflected and discussed the data and interpretation on a regular, iterative basis                                                                                                                                                                                                                                                                                                                                                                                                                                       | [Researchers 4 and 5] had several telephone and one face to face discussion.                                                                                                                                                                                                                                                                                                                                                                                                                                                                                                                                                                                                                                                                                                                                                                                                                                                                                                     |

238 **\*'Crafting' refers to the writing and editing of findings and recommendations to present content and language deemed to be appropriate to the service stakeholders by**  
 239 **the RA team**

1  
2  
3 2404  
5 241 Notes on methods used6  
7 242 It is important to acknowledge that the creative and flexible nature of qualitative methods means8  
9 243 that there is variation in the way different researchers undertake even established methods. While10  
11 244 we refer to the methods with proper nouns, and summarise as 'TA' and 'RA' to provide clarity for the12  
13 245 reader, it should not be assumed that these methods are 'fixed'. In addition, while we refer to the14  
15 246 Framework Method analysis as 'TA', we acknowledge that the Framework Method is one of many16  
17 247 approaches that fall within thematic analysis.[8] We provide a full description of our approach for18  
19 248 transparency. It should also be noted that while both methods use matrices, the approaches are20  
21 249 quite different, in that TA involves the detailed, inductive coding of data, producing a detailed coding22  
23 250 framework, and more complex matrix which accounts more completely for the dataset. RA focuses24  
25 251 on major issues identified in the data, no full coding occurs, and matrices are deductively26  
27 252 constructed.28  
29 25330  
31 254 The comparison32  
33 255 The comparative analysis was conducted between October 2015 and May 2016, comparing three34  
35 256 aspects of the analyses: time taken, findings, and recommendations. Each team recorded the time36  
37 257 taken to perform every activity. Analytical activities were divided into two broad areas: 'data review38  
39 258 and management', and 'data interpretation and report writing', as indicated in Table 1. Summary40  
41 259 statistics were produced using data from the resulting timesheets. Findings we defined as individual42  
43 260 issues identified and included in a report. Recommendations were defined as suggested actions to44  
45 261 improve or maintain the service. Each team then independently compared RA and TA findings,46  
47 262 allocating a 'match', 'partial match' or 'mismatch' category. Both teams then met to discuss and48  
49 263 reach consensus. Any mismatches were discussed, and perceived reasons agreed and recorded and50  
51 264 summary statistics produced.52  
53 265  
54  
55  
56  
57  
58  
59  
60

266 'Patient and Public Involvement'

267 This paper is a methodological exploration of two different means of qualitative analysis. There was  
 268 no PPI involvement in establishing the criteria for comparison nor in facilitating the work. However  
 269 PPI was intrinsic to the original programme from which the data was gleaned [17].

270

## 271 RESULTS

272

### 273 The research teams

274 Table 2 presents the characteristics of the two research teams.

275

276 **Table 2: Characteristics of the two research teams**

| Rapid Analysis Researchers                                    | Thematic Analysis Researchers                           |
|---------------------------------------------------------------|---------------------------------------------------------|
| Clinical                                                      | Lead researcher not clinical                            |
| Embedded in field                                             | No prior exposure to the field                          |
| BT collected the data                                         | Did not collect data                                    |
| Using Rapid Analysis for first time – developing new practice | Experienced in Thematic Analysis, using existing skills |
| Shared office                                                 | No shared space                                         |
| Equal workload within team                                    | IL conducted majority of analysis                       |
| Analysis main task at work                                    | Analysis conducted alongside other commitments          |
| Focused on producing outputs for known stakeholders           | Much less focused on the stakeholder team               |

277

### 278 Comparison of time

279 Table 3 illustrates the time taken at each stage of the process, for the 'management' and  
 280 'interpretation and report writing' stages defined earlier in Table 1. The four hours of background  
 281 discussions to provide IL with context were not counted in the total.

282

1  
2  
3 283 The RA data review and management took around a third of the time of the TA (43 hours and 116.5  
4  
5 284 respectively). The reverse was true of the report writing, RA was more than six times longer at 52  
6  
7 285 hours.  
8

9 286

### 10 11 287 **Comparison of findings**

12  
13 288 The comparison of findings is presented in Table 4. TA elicited marginally more findings than RA (153  
14  
15 289 v 131). There were 107 matches. There are differences in reporting style and level of detail in the  
16  
17 290 matched findings, with the example below highlighting how each team provided similar findings, but  
18  
19 291 with a varied degree of specific information. Both teams had examples where they provided more  
20  
21 292 or less detail than the other on a specific topic, but the reporting style in the RA was consistently  
22  
23 293 more 'polished', with findings more consistently framed in a way that would be more accessible to  
24  
25 294 the intended audience (explored further in the discussion).  
26  
27

28 295

29  
30 296 *"There are issues around communication with ambulances/paramedics." TA finding*

31  
32 297

33  
34 298 *"Some paramedics are unaware that the HBS exists and there have been delays of up to 30 minutes*  
35  
36 299 *between the paramedics being informed of a BBA and this being cascaded down to midwives." RA*  
37  
38 300 *finding*

39  
40 301

41  
42 302 Findings from one method frequently matched two or more from the other: 71 RA and 78 TA  
43  
44 303 findings delivered 107 matches. There were 43 partial matches, where findings identified similar, but  
45  
46 304 not identical issues (28 RA, 37 TA, some matching more than once), for example:  
47  
48

49 305

50  
51 306 *"There was a general consensus that useful meetings with a range of stakeholders were hard to*  
52  
53 307 *arrange for a number of reasons including workload and shift pattern." TA finding*

54  
55 308

1  
2  
3 309 *“While support is strong in-principle, there is no formal process for strategic-level consultation and*  
4  
5 310 *decision-making about the HBT within the provider Trust (outside of the Project Board). In addition,*  
6  
7 311 *busy workloads make collaborative working challenging.” RA finding*  
8

9 312

10  
11 313 Eighty findings could not be matched: 46 or 37% of all RA findings, and 34 (21%) of the TA findings.

12  
13 314 Exploration (see Table 5) revealed that the most common reason for mismatches was that the other

14  
15 315 team simply did not interpret the relevant finding from the data. The TA team did not find 11%, and

16  
17 316 the RA team did not find 12% of the opposite team’s findings. The next most common reason was

18  
19 317 that findings were specific or detailed, rather than key issues with broad relevance. The RA team

20  
21 318 also reported 15 positive findings (successes and achievements) which the TA team did not include

22  
23 319 in a report to the Service: the TA team reflected that they focused on constructive feedback about

24  
25 320 challenges and areas requiring improvement, rather than positive findings (explored further in the

26  
27 321 discussion). For example, the RA team reported “The HBT MWs are generally supportive of the need

28  
29 322 for data collection and comply with this,” and “The Service has produced its first comprehensive

30  
31 323 data report for the Project Board (November 2014).”  
32  
33

34 324

35  
36 325 There were a small number of findings which emerged from interpretation of ‘what was not in the

37  
38 326 data’. For example, the RA team reported that staff may not gain necessary qualifications for

39  
40 327 deployment, which was a risk to service resilience, connecting data on staff training with other data

41  
42 328 concerning service staffing requirements, rather than a direct report from research participants. The

43  
44 329 TA team did not identify this finding. The RA team’s contextual knowledge meant that they

45  
46 330 perceived some TA findings to be incorrect. For example, a TA finding suggesting that regular

47  
48 331 meetings were helpful was rejected, as the RA team had been informed (outside of the formal data

49  
50 332 collection) that the meetings were not functioning as intended.

51  
52  
53 333  
54  
55  
56  
57  
58  
59  
60

334 Finally, the RA team unconsciously suppressed two findings that were politically challenging: they  
 335 agreed with these two findings from the TA team, which concerned relationships and performance  
 336 of individuals connected to the Service (exact examples cannot be provided as they are of a sensitive  
 337 nature). The RA team reflected that while they were aware of these issues, and also knew that the  
 338 Service was aware of them, they did not write them up as findings in the report. This was not an  
 339 actively documented, discussed decision-making process between the RA researchers: it was more  
 340 implicit that they could not 'go there' in a report.

341

342

343 Some findings appeared to have no match, but cross checking revealed that the finding aligned with  
 344 the other team's recommendations (9 RA and 3 TA findings). For example, the RA found that staff  
 345 had requested more emergency training, and the TA recommendations included provision of more  
 346 emergency training.

347

348 In terms of topics, the mismatched findings covered a range of different issues for the service.

349 Both teams identified findings missed by the other team, which covered operational issues and  
 350 leadership and management issues for the Service. The RA team identified findings that were not  
 351 elicited by the TA team relating to strategic issues, promotion of the service, and performance  
 352 management (which were often positive findings about 'successes' not reported by the TA team).

353

354

355 **Table 3: Time taken to complete analysis using rapid analysis and thematic analysis**

|                                           | Rapid analysis team                               |                    |      | Thematic analysis team |                                 |      |       |      |
|-------------------------------------------|---------------------------------------------------|--------------------|------|------------------------|---------------------------------|------|-------|------|
|                                           | Activity                                          | Time taken (hours) |      | Activity               | Time taken (hours)              |      |       |      |
|                                           |                                                   | [R1]               | [R2] | Total                  | [R4]                            | [R5] | Total |      |
| <b>Primary data review and management</b> | Review 2 transcripts and develop summary template | 6                  | 5    | 11                     | Review/code initial transcripts | 11   | 9.5   | 20.5 |



|                                          |                                                     |    |     |    |                                   |     |      |       |
|------------------------------------------|-----------------------------------------------------|----|-----|----|-----------------------------------|-----|------|-------|
|                                          | Refine template                                     | 2  | 2   | 4  | Developing framework              | 3   | 1    | 4     |
|                                          | Complete summary template for remaining transcripts | 13 | 11  | 24 | Review/code remaining transcripts | 82  |      | 82    |
|                                          | Reviewing documents                                 | 2  | 2   | 4  | Reviewing documents               | 4   |      | 4     |
|                                          | Reviewing matrix                                    | 2  | 3   | 5  | Final themes                      | 8   |      | 8     |
|                                          | <b>Total</b>                                        | 25 | 23  | 48 | <b>Total</b>                      | 108 | 10.5 | 118.5 |
| <b>Interpretation and report writing</b> | Writing up findings                                 | 16 | 16  | 32 | Writing up findings               | 4   |      | 4     |
|                                          | Writing recommendations                             | 8  | 12  | 20 | Writing recommendations           | 4   |      | 4     |
|                                          | <b>Total</b>                                        | 24 | 28  | 52 | <b>Total</b>                      | 8   | 0    | 8     |
| <b>TOTAL</b>                             |                                                     |    | 100 |    |                                   |     |      | 126.5 |

356

357

358 **Table 4: Quantitative comparison of findings and recommendations elicited using rapid analysis**359 **and thematic analysis**

|                        |                                                               | <b>Rapid analysis</b> |     | <b>Thematic analysis</b> |     | <b>Total</b> |
|------------------------|---------------------------------------------------------------|-----------------------|-----|--------------------------|-----|--------------|
| <b>Findings</b>        | <b>Matched</b>                                                | 71                    | 54% | 78                       | 51% | 107          |
|                        | <b>Partially matched</b>                                      | 28                    | 21% | 37                       | 24% | 43           |
|                        | <b>No match found</b>                                         | 48                    | 37% | 32                       | 21% | 80           |
|                        | <b>Appears in other team's recommendations (not findings)</b> | 9                     | 7%  | 3                        | 2%  | 12           |
|                        | <b>Total*</b>                                                 | 131                   |     | 153                      |     | N/A          |
| <b>Recommendations</b> | <b>Match</b>                                                  | 18                    | 28% | 32                       | 34% | 32           |
|                        | <b>Partial match</b>                                          | 20                    | 31% | 26                       | 28% | 26           |
|                        | <b>No match</b>                                               | 26                    | 41% | 42                       | 45% | 68           |
|                        | <b>Total*</b>                                                 | 64                    |     | 93                       |     | N/A          |

360 \*This does not reflect column total as findings/recommendations from one team frequently

361 matched (fully or partially) two or more from the other team

362

1  
2  
3 363 **Comparison of recommendations**

4  
5 364 Quantitative comparison of recommendations is presented in Table 4. The RA generated 64  
6  
7 365 recommendations, a third less than the TA. 18 of the RA recommendations matched to 32 of those  
8  
9 366 from the TA, and the individual RA recommendations tended to bring together multiple issues, and  
10  
11 367 were ‘crafted’ in such a way as to provide a smaller, number of recommendations combining  
12  
13 368 multiple points. For example the RA recommendation below encompassed three separate TA  
14  
15 369 recommendations:

16  
17  
18 370

19 371 *Working model: urgently consult regarding whether the model (shift pattern/on call volume/accrued*  
20  
21 372 *time) is fit for purpose, and if it is, how MWs can be supported to avoid burnout. In addition,*  
22  
23 373 *consider whether the Service can realistically attend BBAs within this model, and if not how this key*  
24  
25 374 *objective for the Service can be achieved. (RA recommendation)*

26  
27  
28 375

29  
30 376 *Collect more precise data on which BBAs did or didn’t need to attend. Then look at feasibility of HBS*  
31  
32 377 *attending these women in the home. (TA recommendation 1)*

33  
34 378 *Determine the capacity of current staffing levels and shift patterns. (TA recommendation 2)*

35  
36 379 *Begin discussions with staff on preferences and flexibility in order to meet growing demand. (TA*  
37  
38 380 *recommendation 3)*

39  
40  
41 381

42  
43 382 Some recommendations were more directly matched, for example:

44  
45 383

46  
47 384 *“Require future recruits to have achieved the minimum numeracy/literacy standard.”*

48  
49 385

*TA recommendation*

50  
51 386

52  
53 387 *“Be clear on the necessary baseline skills in numeracy and literacy that are required.”*

54  
55 388

*RA recommendation*

389

390 There were partial matches between 20 RA and 26 TA recommendations, for example.

391

392 *“Ensure robust lines of communication are in place between Home Birth Service and community*  
393 *midwives.” TA recommendation*

394

395 *“Routinely feed back to referring professionals to confirm booking with Home Birth Service, or*  
396 *transfer back to community midwives.” RA recommendation*

397

398 A further 26 (41%) of the RA recommendations, and 42 (43%) of the TA recommendations had no  
399 match. Reasons are presented with examples in Table5.

400

401 The most common reason was that the other team did not identify a particular recommendation, RA  
402 did not find 18 (35%) and TA did not find 3 (12%). Four of these TA recommendations related to  
403 training of midwives, three were about organisation of meetings, and the remainder had no  
404 common theme. The researchers determined that the midwife training recommendations were  
405 important, and had been an analytical blind spot for the RA team. Other mismatched  
406 recommendations were collectively determined to be of low importance by the researchers, except  
407 for the TA team’s recommendation about projected milestones for the service.

408

409 The RA team made 19 recommendations based on ‘what wasn’t in the data’, interpreting beyond  
410 the reported facts. The TA team made 15 recommendations which the RA team did not support, as  
411 their contextual knowledge deemed them unworkable or inappropriate. Nine recommendations that  
412 were not found in the RA recommendations were from the TA team who made a detailed list of  
413 items for a future service dataset while the RA team provided less specific recommendations

1  
2  
3 414 regarding a future data set. Finally, four recommendations were determined to be made due to  
4  
5 415 contextual knowledge of the RA researchers.  
6  
7  
8  
9  
10  
11  
12  
13  
14  
15  
16  
17  
18  
19  
20  
21  
22  
23  
24  
25  
26  
27  
28  
29  
30  
31  
32  
33  
34  
35  
36  
37  
38  
39  
40  
41  
42  
43  
44  
45  
46  
47  
48  
49  
50  
51  
52  
53  
54  
55  
56  
57  
58  
59  
60

For peer review only

**Table 5: suggested reason for mismatched findings and recommendations, with examples**

|                 | <b>Suggested reason for other team not eliciting finding/recommendation</b>               | <b>Rapid analysis</b> | <b>Thematic analysis</b> | <b>Total</b> | <b>Examples</b>                                                                                                                                                                                                            |
|-----------------|-------------------------------------------------------------------------------------------|-----------------------|--------------------------|--------------|----------------------------------------------------------------------------------------------------------------------------------------------------------------------------------------------------------------------------|
| Findings        | Straightforward miss/error                                                                | 16                    | 17                       | 33           | "There has been no Audit against NICE guidelines for contact (number of visits)." - TA                                                                                                                                     |
|                 | Specific/detailed                                                                         | 10                    | 11                       | 21           | "Aromatherapy oils are expensive." TA                                                                                                                                                                                      |
|                 | Positive finding not reported                                                             | 15                    | 0                        | 15           | "Initial engagement visits to community teams by HBT members facilitated implementation." RA                                                                                                                               |
|                 | Finding emerged from 'what is not in the data' - higher level interpretation              | 5                     | 1                        | 6            | "It is not known whether current MSW recruits will be successful in the 45 credit [training] module, and how Service needs will be met if they are not." RA                                                                |
|                 | The embedded team's knowledge of the context meant they did not agree                     | 0                     | 3                        | 3            | Examples suppressed as sensitive                                                                                                                                                                                           |
|                 | Suppressed as politically challenging                                                     | 0                     | 2                        | 2            | Examples suppressed as sensitive                                                                                                                                                                                           |
|                 | <b>Total</b>                                                                              | <b>46</b>             | <b>34</b>                | <b>80</b>    |                                                                                                                                                                                                                            |
| Recommendations | Straightforward miss/error                                                                | 3                     | 18                       | 21           | "Ensure that meetings are attended by as many of full and part-time workers as possible." TA                                                                                                                               |
|                 | Recommendation emerged from 'what is not in the data' - higher level interpretation       | 19                    | 0                        | 19           | "Consider whether services which fall outside of 'standard' maternity care should be routinely offered, e.g. complementary therapies, hypnobirthing, pool provision, high frequency or duration of contact with women." RA |
|                 | Embedded RA team's contextual knowledge meant that they did not agree with recommendation | 0                     | 15                       | 15           | "Co-locate the HBS with other maternity services." TA – the RA team knew that this was not possible at the participating hospital trust.                                                                                   |
|                 | Specific/detailed recommendations for a service dataset or audit                          | 0                     | 9                        | 9            | "Frequency of texts between mother and midwives could be retrospectively collated to demonstrate improved accessibility." TA                                                                                               |
|                 | Contextual knowledge was used to develop recommendation                                   | 4                     | 0                        | 4            | "Ensure that the HBT midwives are sufficiently familiar with Birth Centre/Delivery Suite facilities and protocols." RA – the TA team assumed this would be the case already                                                |
|                 | <b>Total</b>                                                                              | <b>26</b>             | <b>42</b>                | <b>68</b>    |                                                                                                                                                                                                                            |

## 320 **DISCUSSION**

321

### 322 **Principal findings**

323 This study compared rapid and thematic analysis methods applied to the same dataset, to explore  
324 whether RA provides timely, accurate outputs for services. RA data management took around a third  
325 of the time of TA, but RA interpretation and write up took more than 6 times longer than TA. There  
326 was considerable overlap in the findings and recommendations between the two methods, with RA  
327 identifying marginally more findings than TA, and TA making marginally more recommendations  
328 than the RA. The comparison identified qualitative differences in the depth and detail of findings  
329 and recommendations in the two teams.

330

### 331 **Strengths and limitations of the study**

332

333 Strengths and limitations in the RA and TA processes

334 The qualitative analysis processes followed by each team have been described in detail to enhance  
335 reproducibility and reliability. However, we acknowledge that work of this nature can never be  
336 reproducible, due to the subjectivity of qualitative researchers and processes,[22] and the fact that  
337 research is a situated practice, where some aspects of the activity are beyond the control of the  
338 researcher.[23] In qualitative research there is much debate regarding subjectivity, reflexivity, and  
339 bias.[22, 24] In the conduct of our work we attempted to minimise 'bias' and described our  
340 methods in detail, though we have also retrospectively identified opportunities where others can  
341 mitigate this further in future work. The findings of research such as ours, which does reflect on and  
342 compare processes and findings in a systematic and detailed manner, can contribute to  
343 understanding the challenges faced by researchers.[25] The characteristics of the researchers are  
344 acknowledged and explored. Researchers were similar in that they were all experienced  
345 postdoctoral health services researchers, working in the same Institute for some time, arguably with

1  
2  
3 346 similar cultures, though we acknowledge that the human, interpretive nature of qualitative research  
4  
5 347 means that standardisation or researchers within and between the teams is not possible. There were  
6  
7 348 differences between the researchers (see Table 2). These factors may have conferred variation in  
8  
9 349 analysis and interpretation.

10  
11 350

12  
13 351 The RA team had greater contextual knowledge resulting from previous clinical exposure as health  
14  
15 352 professionals, and working closely with the service. This appeared to impart an underlying level of  
16  
17 353 understanding that was critical to the findings and particularly recommendations. It is useful to think  
18  
19 354 about the concept of research as a situated practice in the context of our work. This may be  
20  
21 355 particularly relevant for researchers who are 'embedded' in some way within the service being  
22  
23 356 researched. Whilst such embeddedness can help to provide useful insights into the meaning and  
24  
25 357 relevance of research findings it is important to be aware that this may unconsciously influence data  
26  
27 358 interpretation.[23] RA in a health service setting without this background knowledge may be  
28  
29 359 inappropriate. Around a third of RA findings were not accounted for by the TA: RA generated a large  
30  
31 360 number of additional findings, suggesting that closeness to the field and data may have conferred an  
32  
33 361 advantage. It has been recommended previously that contextual information should be provided to  
34  
35 362 secondary analysts to mitigate the lack of exposure to the field.[21] The intended comparison of  
36  
37 363 methods and need to avoid conferring between teams meant that the TA only received brief  
38  
39 364 information, rather than the rich, iterative contextual information that may be more typically  
40  
41 365 provided within secondary analysis.

42  
43  
44  
45 366

46  
47 367

48  
49 368 The RA was conducted for a specific group of stakeholders, and the interpretation, and crafting of  
50  
51 369 findings and recommendations was done with these individuals in mind. Though not conscious of  
52  
53 370 this at the time of analysis, on reflection we believe that this focus on a specific audience, in addition  
54  
55 371 to [researchers 1 and 2]'s relationship and sense of reciprocity with the service, may have resulted in

1  
2  
3 372 a more lengthy approach. We reflected that it also resulted in more focus on reporting positive  
4  
5 373 findings, or 'good news' in the RA team, and suppressing negative findings that concerned  
6  
7 374 individuals, which the RA researchers deemed inappropriate to report in an evaluation output that  
8  
9 375 would be widely shared. This contrasts with the TA which was a 'desktop exercise', with no  
10  
11 376 commitment to the research participants, which we feel made the process more straightforward,  
12  
13 377 with less need for careful presentation of data. This provides a clear example of researchers  
14  
15 378 navigating the "politics of research", telling stories differently as a result of the different purpose  
16  
17 379 and context of the research.[26]  
18

19  
20 380

21 381 A second factor in explaining the lengthy RA is that it is the first time that [researchers 1 and 2] have  
22  
23 382 used RA. Adapting to a new method can take time and discipline is required not to refer to more  
24  
25 383 familiar, lengthier practices. However the number and detail in the findings and recommendations in  
26  
27 384 the RA (131, 62 respectively) was similar to those in the TA (153, 93). For qualitative researchers  
28  
29 385 trained in TA it may be difficult to wholly adopt the brevity required of RA.  
30

31  
32 386

33  
34 387 The TA was predominantly conducted by one researcher [researcher 4], providing fewer  
35  
36 388 opportunities for reflection in the TA development. The RA team also had the opportunity for  
37  
38 389 ongoing regular reflection due to shared office space, which may have enhanced but also  
39  
40 390 lengthened the process.  
41

42  
43 391

44  
45 392 Our approach to this work was pragmatic, based on available researcher capacity, and there was  
46  
47 393 variation in researcher characteristics, in their programmes of existing work, and embeddedness in  
48  
49 394 the field for this study, which may have impacted on the outputs from the work. In future  
50  
51 395 comparisons, involving some or all of both teams in data collection would provide equality in  
52  
53 396 exposure and embeddedness, and increasing similarity in researcher characteristics could provide  
54  
55 397 further parity. The workload and capacity issues are more problematic. The time taken to  
56  
57



1  
2  
3 398 undertake analysis varies from project to project, based on the available time, deadlines, funding  
4  
5 399 and competing priorities. Generally there is always scope for extended analysis of data to explore it  
6  
7 400 further, and researchers must make pragmatic decisions about when analysis for a specific project is  
8  
9 401 'finished'. It is likely that there is variation between decisions to cease analysis between research  
10  
11 402 teams, particularly in our comparison, where the analysis was a 'desk top exercise' for the TA team  
12  
13 403 and a 'real' project with stakeholders expecting outputs from the RA team, meaning the latter may  
14  
15 404 be more inclined to spend longer on the project. To mitigate this, increased parity across the RA and  
16  
17 405 TA researchers could be achieved by using two equal-sized teams, with equal division of labour, and  
18  
19 406 explicit allocation of capacity to the project. However, it is still impossible to standardise decisions  
20  
21 407 regarding what constitutes 'enough' work on a dataset.  
22

23  
24 408

25  
26 409 Strengths and limitations in the comparison process

27  
28 410 This paper has provided an opportunity to explore and reflect on approaches to comparing  
29  
30 411 qualitative methods. The limited evidence base necessitated the development of the comparison  
31  
32 412 methodology. The study team regularly met to review the process, emerging findings and  
33  
34 413 interpretation to enhance the rigour of the exercise. A mixed methods approach was undertaken in  
35  
36 414 order to explore RA, which allows for a broader exploration of a phenomenon (the analytical  
37  
38 415 process) than quantitative or qualitative methods alone.[27-29] However, the qualitative aspect was  
39  
40 416 restricted to evaluation of the alignment content outputs of the research and description of the  
41  
42 417 researcher characteristics and activity diaries by the researchers themselves. Future comparisons of  
43  
44 418 methods could be strengthened with the addition of independent qualitative evaluation of the  
45  
46 419 research processes and outputs. A limitation of the quantitative approach to comparing outputs  
47  
48 420 from qualitative work is that it reduces findings and recommendations, directly comparing individual  
49  
50 421 outputs which display different levels of depth and detail. It is important to highlight that 'more'  
51  
52 422 does not necessarily equal 'better' in qualitative research outputs.  
53

54  
55 423  
56  
57  
58  
59

1  
2  
3 424 An important consideration when undertaking comparison of methods is the variation in processes  
4  
5 425 between individual researchers. For example, while TA using the Framework Method follows an  
6  
7 426 established process described in the literature, it is acknowledged that the complex nature of  
8  
9 427 qualitative analysis, and the role of the researcher in the process, means that there will always be  
10  
11 428 variation between researchers in the exact physical and cognitive processes involved. It is therefore  
12  
13 429 not possible to 'standardise' between researchers, within or between the two methods being  
14  
15 430 compared. Whilst we perceive comparisons of this nature to be worthwhile in order to develop and  
16  
17 431 understand the applications of qualitative methods, they must include detailed description of and  
18  
19 432 reflection upon the processes and researchers.

20  
21  
22 433

23  
24 434

25  
26 435 The complexity of the process only became clear once the researchers began to compare the data.  
27  
28 436 Differences in style and the degree of 'polishing' of the content and language with the RA team  
29  
30 437 'crafting' findings and recommendations deemed sensitive and appropriate to be shared with  
31  
32 438 stakeholders, and the resulting impact on time taken, was not apparent until analyses were  
33  
34 439 complete and outputs shared. In addition, devising an approach to categorising and reporting  
35  
36 440 mismatched findings and recommendations took time and was not as intuitive.

37  
38  
39 441

40  
41 442 A further limitation is the fact that the comparison was conducted by the researchers themselves,  
42  
43 443 due to pragmatic resource constraints. While we acknowledged this and aimed to maintain  
44  
45 444 objectivity, there is clearly a risk of bias in interpretation, and future projects should consider  
46  
47 445 involving an independent, blinded third party to conduct the comparison.

48  
49 446

50  
51 447 An unexpected outcome of this study is that it has encouraged us to reflect deeply on our own  
52  
53 448 research practice, resulting in a better understanding of our methods and role. Future comparisons  
54  
55 449 may benefit from independent exploration of the researchers' individual processes alongside the

1  
2  
3 450 'outcomes' of time, findings and recommendations. It is clear that there are a number of barriers  
4  
5 451 which may constrain the research process in a service evaluation of the type we conducted. Greater  
6  
7 452 reciprocal appreciation that these exist, and what they are, may help to facilitate discussions where  
8  
9 453 there are unexpected or unpalatable research findings.[30]

10  
11 454 The initial intention was to involve participants in reviewing the importance of mismatched findings  
12  
13 455 and recommendations. This was not practicable due to the unexpected length of time taken to  
14  
15 456 complete the comparison, and the need for service stakeholders to determine whether mismatches  
16  
17 457 would have been helpful many months in the past.

18  
19  
20 458

21  
22 459 It is important to note that all researchers in this study were experienced in qualitative health  
23  
24 460 research using TA, and as such this study does not explore RA and TA for novice researchers.

25  
26 461

27  
28 462 Possible explanations for the differences in time taken to conduct analysis

29  
30 463 The time taken in the RA was much shorter at the data review and management stage, equating to  
31  
32 464 around two weeks less whole time equivalent (WTE) researcher time. This suggests that managing  
33  
34 465 data in this way within a short timeframe is possible. However, the interpretation and reporting  
35  
36 466 phase was much longer with RA (6.5 days versus one day in TA). A number of factors may have  
37  
38 467 contributed. Time saved in coding and data management may result in more time being required at  
39  
40 468 the interpretation stage in RA. This needs further exploration, RA only took three WTE researcher  
41  
42 469 days less than TA, which may be of little benefit to academic or health service stakeholders. There  
43  
44 470 are further possible explanations: the researchers' relationship with the service, the purpose of the  
45  
46 471 research, the capacity of researchers, and the fact that the RA team were learning a new skill. This is  
47  
48 472 explored earlier in the strengths and limitations section.

49  
50  
51 473

52  
53 474 Possible explanations for the difference in findings

1  
2  
3 475 The RA findings accounted for 78 of the 153, or 79% of the findings delivered by the TA. This  
4  
5 476 considerable overlap indicates that TA, which codes all data, did not produce many additional  
6  
7 477 findings. This is consistent with others' findings comparing themes generated from different  
8  
9 478 analytical approaches.

10  
11 479

12  
13 480 The most common reason for mismatches in findings was that the researchers had not identified the  
14  
15 481 issue in error. In the RA, patterns and findings may have been missed as a result of the more  
16  
17 482 deductive approach taken, and the reduced time spent with primary data. However, there was a  
18  
19 483 'did-not-find rate' of around one in ten for both methods, suggesting that this was not the case . The  
20  
21 484 mismatches suggest that qualitative researchers will never elicit perfectly overlapping findings,  
22  
23 485 regardless of method.

24  
25  
26 486

27  
28 487 A number of mismatches were accounted for by unconscious suppression of challenging findings,  
29  
30 488 higher level interpretation, and differences in contextual knowledge leading to the rejection of  
31  
32 489 findings. These explanations were more prevalent in the RA team, suggesting that embeddedness  
33  
34 490 influences these processes. Between a quarter (RA) and a third (TA) of the mismatched findings were  
35  
36 491 somewhat detailed, highlighting differences in natural reporting style, interpretation and  
37  
38 492 prioritisation of what was meaningful. Again, this may arise between different researchers,  
39  
40 493 regardless of method. Mays and Pope relate how observations are "*limited by definition to the*  
41  
42 494 *perceptions and introspection of the investigator,*"[31] and variations in perception and introspection  
43  
44 495 are inevitable between different individuals. There are different views regarding whether qualitative  
45  
46 496 findings should be reproducible,[32] but we take the stance that subjectivity and individual variation  
47  
48 497 make this impossible. This has been a useful exercise in reflexivity, demonstrating how experiences  
49  
50 498 and unconscious processes impact on findings.

51  
52  
53 499

1  
2  
3 500 The TA team did not report positive findings, accounting for a further portion of the mismatch: this  
4  
5 501 was attributed to differences in interpretation of the project scope, rather than analytical processes  
6  
7 502 delivering different results. Also the TA team were aware that they would not be presenting findings  
8  
9 503 to providers, meaning that they felt more able to be critical and candid.

10  
11 504

12  
13 505 Possible explanations for the difference in recommendations

14  
15 506 The recommendations also demonstrated overlap, with around three out of five being accounted for  
16  
17 507 by both teams. However, RA did not pick up a third of the TA recommendations. We perceive that  
18  
19 508 the majority reflected relevant but non-essential detail, and the 'make or break' recommendations  
20  
21 509 that were key to the sustainability of the service were not missed, though we acknowledge that this  
22  
23 510 is a subjective judgement. Arguably the most important recommendation missed related to training  
24  
25 511 midwives in administrative and management skills. This detail is consistent with the TA process,  
26  
27 512 where the data was explored in more depth, leading to more precise recommendations. However,  
28  
29 513 this pattern was not observed in the findings. A possible explanation is that the RA team, with the  
30  
31 514 eventual audience in mind, were more conservative in the number and detail of recommendations.  
32  
33 515 Over half of RA recommendations that the TA did not find were accounted for by higher level  
34  
35 516 interpretation and contextual knowledge, and just under half of the TA mismatched  
36  
37 517 recommendations were deemed inappropriate by the RA team due to contextual knowledge,  
38  
39 518 suggesting that embeddedness in the field confers advantages, separate from the method used.

40  
41  
42  
43 519

44  
45 520

46  
47 521 **CONCLUSION**

48  
49 522 We found that RA was appropriate and delivered valid findings and recommendations, with  
50  
51 523 reassuring but not complete overlap. Mismatches appeared to relate to minor or detailed issues. RA  
52  
53 524 enabled considerable time savings in data management , but may not be as rapid as assumed.  
54  
55 525 Further work is needed, addressing the limitations identified, to establish how much time

1  
2  
3 526 experienced RA researchers can save, whether differences in outputs are due to the analytical  
4  
5 527 method or other influences, and whether these are relevant and of practical benefit for stakeholders  
6  
7 528 and to services. Researcher characteristics, conduct, and roles are key, and our impression is that RA  
8  
9 529 requires the researchers to be embedded in the field.

10  
11 530

12  
13 531 We do not advocate RA for granular exploration of complex questions, for example individuals'  
14  
15 532 experience of phenomena. It could be used to rapidly identify issues for further, in depth qualitative  
16  
17 533 exploration. RA represents one of many tools of the qualitative researcher's trade, with particular  
18  
19 534 potential for use in applied health research, when timely reporting is needed. We advocate further  
20  
21 535 work to identify the practical application and use of different rapid approaches in practice.  
22  
23  
24  
25  
26  
27  
28  
29  
30  
31  
32  
33  
34  
35  
36  
37  
38  
39  
40  
41  
42  
43  
44  
45  
46  
47  
48  
49  
50  
51  
52  
53  
54  
55  
56  
57  
58  
59  
60

**536 FUNDING**

537 'This work was supported by the National Institute for Health Research (NIHR) through the West  
538 Midlands Collaborations for Leadership in Applied Health Research and Care (CLAHRC-WM)  
539 programme. The work was developed independently by the authors, and the views expressed are  
540 those of the authors and not necessarily those of the NHS, the NIHR or the Department of Health.

541

**542 COMPETING INTERESTS**

543 Competing interests: All authors have completed the ICMJE uniform disclosure form  
544 at [www.icmje.org/coi\\_disclosure.pdf](http://www.icmje.org/coi_disclosure.pdf) and declare: no support from any organisation for the  
545 submitted work; no financial relationships with any organisations that might have an interest in the  
546 submitted work in the previous three years; no other relationships or activities that could appear to  
547 have influenced the submitted work.

548

**549 AUTHORS' CONTRIBUTIONS**

550 The original idea for the project was conceived by SK. The study was designed by BT with intellectual  
551 input from all authors. Primary data collection was conducted by BT. Rapid analysis of data was  
552 conducted by BT and CH, with input from SK. Thematic analysis of data was conducted by IL with  
553 input from SG. Comparison of time data was conducted by BT, and checked by CH and IL. Initial  
554 comparison of findings and recommendations was conducted by BT, CH, IL and SK, and all authors  
555 reviewed outputs from the comparison. The preliminary draft of the paper was written by BT. This  
556 was critically reviewed by CH, IL, SG and SK for important intellectual content and subsequent  
557 revisions to the paper were undertaken by BT as a result. Final approval of the version of the paper  
558 to be published was granted by BT, CH, IL, SG and SK, who all also agreed to be accountable for all  
559 aspects of the work in ensuring that questions relating to the accuracy or integrity of any part of the  
560 work are appropriately investigated and resolved.

561

1  
2  
3 562 **ACKNOWLEDGEMENTS**

4  
5 563 We are grateful to Louise Bentham who conducted thematic analysis of three of transcripts and  
6  
7 564 reviewed findings with IL.

8  
9 565

10  
11 566 We extend our thanks to the hospital trust, who initiated the primary research project and granted  
12  
13 567 permission for the work, and to the staff who gave up their time and shared their perspectives so  
14  
15 568 generously.

16  
17 569

18  
19 570 We are grateful to the Scientific Advisory Committee of the West Midlands Collaboration for  
20  
21 571 Leadership in Applied Health Research and Care, who provided feedback on initial findings and  
22  
23 572 interpretation.

24  
25 573

26  
27 574 CH acknowledges support from the NIHR Oxford cognitive health Clinical Research Facility.

28  
29 575

30  
31 576 **DATA SHARING**

32  
33 577 Data is securely stored at the University of Birmingham in line with our information governance and  
34  
35 578 data protection policies. Due to the confidential nature of our qualitative data, which may identify  
36  
37 579 individuals even following anonymization, we have not made the data publicly available, in line with  
38  
39 580 our research permissions and consent.



581 **LIST OF ABBREVIATIONS**

582

583 RA – Rapid Analysis

584 TA – Thematic Analysis

585 CLAHRC – Collaborations for Leadership in Applied Health Research and Care

586 MSW – Midwifery Support Worker

587

588

589 **REFERENCES**

590

- 591 1. Tariq S, Woodman J: **Using mixed methods in health research**. *JRSM Short Reports* 2013,  
592 4(6):2042533313479197.
- 593 2. Yardley L, Bishop FL: **Using mixed methods in health research: benefits and challenges**.  
594 *British journal of health psychology* 2015, 20(1):1-4.
- 595 3. Spiller K, Ball K, Daniel E, Dibb S, Meadows M, Canhoto A: **Carnavalesque collaborations:  
596 reflections on ‘doing’ multi-disciplinary research**. *Qualitative Research* 2015, 15(5):551-567.
- 597 4. Garfield S, Jheeta S, Jacklin A, Bischler A, Norton C, Franklin BD: **Patient and public  
598 involvement in data collection for health services research: a descriptive study**. *Research  
599 Involvement and Engagement* 2015, 1(1):8.
- 600 5. Martens PJ, Roos NP: **When health services researchers and policy makers interact: tales  
601 from the tectonic plates**. *Healthcare policy = Politiques de sante* 2005, 1(1):72-84.
- 602 6. Vindrola-Padros C, Vindrola-Padros B: **Quick and dirty? A systematic review of the use of  
603 rapid ethnographies in healthcare organisation and delivery**. *BMJ Quality & Safety*  
604 2017.
- 605 7. Johnson GA, Vindrola-Padros C: **Rapid qualitative research methods during complex health  
606 emergencies: A systematic review of the literature**. *Social Science & Medicine* 2017, 189:63-  
607 75.
- 608 8. Gale N, Heath G, Cameron E, Rashid S, Redwood S: **Using the framework method for the  
609 analysis of qualitative data in multi-disciplinary health research**. *BMC medical research  
610 methodology* 2013, 13:117.
- 611 9. Ziebland S, McPherson A: **Making sense of qualitative data analysis: an introduction with  
612 illustrations from DIPEX (personal experiences of health and illness)**. *Medical education*  
613 2006, 40(5):405-414.
- 614 10. Beebe J: **Rapid assessment process: An introduction**. Walnut Creek, CA: Altamira Press;  
615 2003.
- 616 11. Burgess-Allen J, Owen-Smith V: **Using mind mapping techniques for rapid qualitative data  
617 analysis in public participation processes**. *Health expectations : an international journal of  
618 public participation in health care and health policy* 2010, 13(4):406-415.
- 619 12. Neal JW, Neal ZP, VanDyke E, Kornbluh M: **Expediting the Analysis of Qualitative Data in  
620 Evaluation: A Procedure for the Rapid Identification of Themes From Audio Recordings  
621 (RITA)**. *American Journal of Evaluation* 2014.

- 1  
2  
3 622 13. **Qualitative Methods in Rapid Turn-Around Health Services Research**  
4 623 [[http://www.hsrdr.research.va.gov/for\\_researchers/cyber\\_seminars/archives/video\\_archive.cfm?SessionID=780](http://www.hsrdr.research.va.gov/for_researchers/cyber_seminars/archives/video_archive.cfm?SessionID=780)]  
5 624  
6 625 14. Seale C, Charteris-Black J, MacFarlane A, McPherson A: **Interviews and internet forums: a**  
7 626 **comparison of two sources of qualitative data.** *Qualitative health research* 2010, **20**(5):595-  
8 627 606.  
9 628 15. Putten JV, Nolen AL: **Comparing Results from Constant Comparative and Computer**  
10 629 **Software Methods: A Reflection about Qualitative Data Analysis.** *Journal of Ethnographic &*  
11 630 *Qualitative Research* 2010, **5**(2):99-112.  
12 631 16. Greenwood M, Kendrick T, Davies H, Gill FJ: **Hearing voices: Comparing two methods for**  
13 632 **analysis of focus group data.** *Applied Nursing Research* 2017, **35**:90-93.  
14 633 [<http://www2.warwick.ac.uk/fac/med/about/centres/clahrc/>]  
15 634 17. Braun V, Clarke V: **Using thematic analysis in psychology** *Qualitative Research in Psychology*  
16 635 2006, **3**(2):83.  
17 636 19. Ritchie J, Lewis J: **Qualitative research practice: a guide for social science students and**  
18 637 **researchers.** London: Sage; 2003.  
19 638 20. Davies R: **Planning Evaluability Assessments: A Synthesis of the Literature with**  
20 639 **Recommendations.** In. London; 2013.  
21 640 21. Heaton J: **Secondary Analysis of Qualitative Data: An Overview.** *Historical Social Research /*  
22 641 *Historische Sozialforschung* 2008, **33**(3 (125)):33-45.  
23 642 22. Roulston K, Shelton SA: **Reconceptualizing Bias in Teaching Qualitative Research Methods.**  
24 643 *Qualitative Inquiry* 2015, **21**(4):332-342.  
25 644 23. Malthouse R, Roffey-Barentsen J, Watts M: **Reflectivity, reflexivity and situated reflective**  
26 645 **practice.** *Professional Development in Education* 2014, **40**(4):597-609.  
27 646 24. Norris N: **Error, bias and validity in qualitative research.** *Educational Action Research* 1997,  
28 647 **5**(1):172-176.  
29 648 25. Richards HM, Schwartz LJ: **Ethics of qualitative research: are there special issues for health**  
30 649 **services research?** *Family practice* 2002, **19**(2):135-139.  
31 650 26. F. DP, Yiannis G, Banu ÖP: **Untold stories of the field and beyond: narrating the chaos.**  
32 651 *Qualitative Research in Organizations and Management: An International Journal* 2013,  
33 652 **8**(1):4-15.  
34 653 27. JW C: **A concise introduction to mixed methods research.** Los Angeles: Sage; 2014.  
35 654 28. Shneerson CL, Gale NK: **Using mixed methods to identify and answer clinically relevant**  
36 655 **research questions.** *Qualitative health research* 2015, **25**(6):845-856.  
37 656 29. Pluye P, Hong QN: **Combining the power of stories and the power of numbers: mixed**  
38 657 **methods research and mixed studies reviews.** *Annual review of public health* 2014, **35**:29-  
39 658 45.  
40 659 30. van der Graaf P, Forrest LF, Adams J, Shucksmith J, White M: **How do public health**  
41 660 **professionals view and engage with research? A qualitative interview study and**  
42 661 **stakeholder workshop engaging public health professionals and researchers.** *BMC Public*  
43 662 *Health* 2017, **17**(1):892.  
44 663 31. Mays N, Pope C: **Rigour and qualitative research.** *BMJ (Clinical research ed)* 1995,  
45 664 **311**(6997):109-112.  
46 665 32. Dixon-Woods M, Shaw R, Agarwal S, Smith J: **The problem of appraising qualitative**  
47 666 **research.** *Quality & safety in health care* 2004, **13**(3):223-225.  
48  
49  
50  
51 667  
52  
53  
54  
55  
56  
57  
58  
59  
60

## Summary Template

| Home Birth Service Exploratory Review Summary Template                                                                                                                                                            |  |
|-------------------------------------------------------------------------------------------------------------------------------------------------------------------------------------------------------------------|--|
| PREPARED BY:                                                                                                                                                                                                      |  |
| DATE:                                                                                                                                                                                                             |  |
| DATA TYPE (document, interview transcript, focus group transcript):                                                                                                                                               |  |
| FOR INTERVIEWS AND FOCUS GROUPS:                                                                                                                                                                                  |  |
| <i>PARTICIPANT IDENTIFIER/S</i>                                                                                                                                                                                   |  |
| <i>PARTICIPANT ROLE</i>                                                                                                                                                                                           |  |
| <i>PARTICIPANT ROLE IN THE HBS</i>                                                                                                                                                                                |  |
| FOR DOCUMENTS:                                                                                                                                                                                                    |  |
| TITLE                                                                                                                                                                                                             |  |
| DATE OF PRODUCTION                                                                                                                                                                                                |  |
| AUTHOR                                                                                                                                                                                                            |  |
| RATIONALE FOR IMPLEMENTING HBS (POLICY, EVIDENCE, OTHER)                                                                                                                                                          |  |
| What was the problem, what was going wrong?                                                                                                                                                                       |  |
| What was the vision (envisaged outputs, outcomes, impact)                                                                                                                                                         |  |
| TRAINING:                                                                                                                                                                                                         |  |
| PROGRAMME THEORY/LOGIC MODEL:                                                                                                                                                                                     |  |
| <i>INPUTS (resources, people)</i>                                                                                                                                                                                 |  |
| <i>ACTIVITIES (what workers do, e.g. promotional work, clinical care)</i>                                                                                                                                         |  |
| <i>OUTPUTS (what activities deliver, e.g. women informed about the HBS, women receive intrapartum care at home) and OUTCOMES (results of the outputs, e.g. women book with the HBS, women give birth at home)</i> |  |
| <i>IMPACT/GOAL (overall aims of programme, e.g. home birth booking rate increases, home birth rate increases)</i>                                                                                                 |  |
| FACILITATORS of IMPLEMENTATION                                                                                                                                                                                    |  |
| Planning/process                                                                                                                                                                                                  |  |
| People                                                                                                                                                                                                            |  |
| Culture                                                                                                                                                                                                           |  |
| Money                                                                                                                                                                                                             |  |
| Organisation/bureaucracy                                                                                                                                                                                          |  |
| Evidence/policy                                                                                                                                                                                                   |  |
| Other                                                                                                                                                                                                             |  |
| BARRIERS TO IMPLEMENTATION AND SOLUTIONS                                                                                                                                                                          |  |
| Planning/process                                                                                                                                                                                                  |  |
| People                                                                                                                                                                                                            |  |
| Culture                                                                                                                                                                                                           |  |
| Money                                                                                                                                                                                                             |  |
| Organisation/bureaucracy                                                                                                                                                                                          |  |
| Evidence/policy                                                                                                                                                                                                   |  |
| Other                                                                                                                                                                                                             |  |
| ROUTINELY GATHERED DATA (HOW,WHERE, WHEN, WHO COLLECTED, WHERE DATA HELD)                                                                                                                                         |  |
| KEY DOCUMENTS WE SHOULD INCLUDE (e.g. service specification)                                                                                                                                                      |  |
| OTHER IMPORTANT OBSERVATIONS                                                                                                                                                                                      |  |
| IMPORTANT QUOTATIONS                                                                                                                                                                                              |  |
| REFLECTIONS ON THE DATA COLLECTION EPISODE                                                                                                                                                                        |  |
