# Supplementary material for: Can rapid approaches to qualitative analysis deliver timely, valid findings to clinical leaders? A mixed methods study comparing rapid and thematic analysis
Source: PubMed Central journal article supplement (PMC6194404; doi:10.1136/bmjopen-2017-019993), 2018-10-08
Supplement: bmjopen-2017-019993supp001.pdf [file bmjopen-2017-019993supp001.pdf]

## Summary Template

| Home Birth Service Exploratory Review Summary Template                                                                                                                                                                                                                                                                                                                                                                                                                                                         |
|----------------------------------------------------------------------------------------------------------------------------------------------------------------------------------------------------------------------------------------------------------------------------------------------------------------------------------------------------------------------------------------------------------------------------------------------------------------------------------------------------------------|
| <b>PREPARED BY:</b>                                                                                                                                                                                                                                                                                                                                                                                                                                                                                            |
| <b>DATE:</b>                                                                                                                                                                                                                                                                                                                                                                                                                                                                                                   |
| <b>DATA TYPE</b> (document, interview transcript, focus group transcript):                                                                                                                                                                                                                                                                                                                                                                                                                                     |
| <b>FOR INTERVIEWS AND FOCUS GROUPS:</b><br><i>PARTICIPANT IDENTIFIER/S</i><br><i>PARTICIPANT ROLE</i><br><i>PARTICIPANT ROLE IN THE HBS</i>                                                                                                                                                                                                                                                                                                                                                                    |
| <b>FOR DOCUMENTS:</b><br><b>TITLE</b><br><b>DATE OF PRODUCTION</b><br><b>AUTHOR</b>                                                                                                                                                                                                                                                                                                                                                                                                                            |
| <b>RATIONALE FOR IMPLEMENTING HBS (POLICY, EVIDENCE, OTHER)</b><br><b>What was the problem, what was going wrong?</b><br><b>What was the vision</b> (envisaged outputs, outcomes, impact)                                                                                                                                                                                                                                                                                                                      |
| <b>TRAINING:</b>                                                                                                                                                                                                                                                                                                                                                                                                                                                                                               |
| <b>PROGRAMME THEORY/LOGIC MODEL:</b><br><i>INPUTS</i> (resources, people)<br><i>ACTIVITIES</i> (what workers do, e.g. promotional work, clinical care)<br><i>OUTPUTS</i> (what activities deliver, e.g. women informed about the HBS, women receive intrapartum care at home) <b>and</b> <i>OUTCOMES</i> (results of the outputs, e.g. women book with the HBS, women give birth at home)<br><i>IMPACT/GOAL</i> (overall aims of programme, e.g. home birth booking rate increases, home birth rate increases) |
| <b>FACILITATORS of IMPLEMENTATION</b><br>Planning/process<br>People<br>Culture<br>Money<br>Organisation/bureaucracy<br>Evidence/policy<br>Other                                                                                                                                                                                                                                                                                                                                                                |
| <b>BARRIERS TO IMPLEMENTATION AND SOLUTIONS</b><br>Planning/process<br>People<br>Culture<br>Money<br>Organisation/bureaucracy<br>Evidence/policy<br>Other                                                                                                                                                                                                                                                                                                                                                      |
| <b>ROUTINELY GATHERED DATA</b> (HOW,WHERE, WHEN, WHO COLLECTED, WHERE DATA HELD)                                                                                                                                                                                                                                                                                                                                                                                                                               |
| <b>KEY DOCUMENTS WE SHOULD INCLUDE</b> (e.g. service specification)                                                                                                                                                                                                                                                                                                                                                                                                                                            |
| <b>OTHER IMPORTANT OBSERVATIONS</b>                                                                                                                                                                                                                                                                                                                                                                                                                                                                            |
| <b>IMPORTANT QUOTATIONS</b>                                                                                                                                                                                                                                                                                                                                                                                                                                                                                    |
| <b>REFLECTIONS ON THE DATA COLLECTION EPISODE</b>                                                                                                                                                                                                                                                                                                                                                                                                                                                              |
